# Supplementary material
Source: PubMed Central journal article supplement (PMC7894212)
Supplement: NIHMS1669320-supplement-Supporting_Information.pdf [file NIHMS1669320-supplement-Supporting_Information.pdf]

## Supporting Information

# The Chiron Approach to (3*R*,3*aS*,6*aR*)-hexahydrofuro[2,3-*b*]furan-3-ol, a Key Subunit of HIV-1 Protease Inhibitor Drug, Darunavir

Arun K. Ghosh,\* Shivaji B. Markad, and William L. Robinson

*Department of Chemistry and Department of Medicinal Chemistry, Purdue University, 560 Oval  
Drive, West Lafayette, Indiana 47907*

akghosh@purdue.edu

### Contents:

|                                                         |         |
|---------------------------------------------------------|---------|
| <sup>1</sup> H-NMR and <sup>13</sup> C-NMR Spectra..... | S2-S31  |
| Zoomed NMR Spectra.....                                 | S32-S48 |
| HPLC Data.....                                          | S49-S52 |

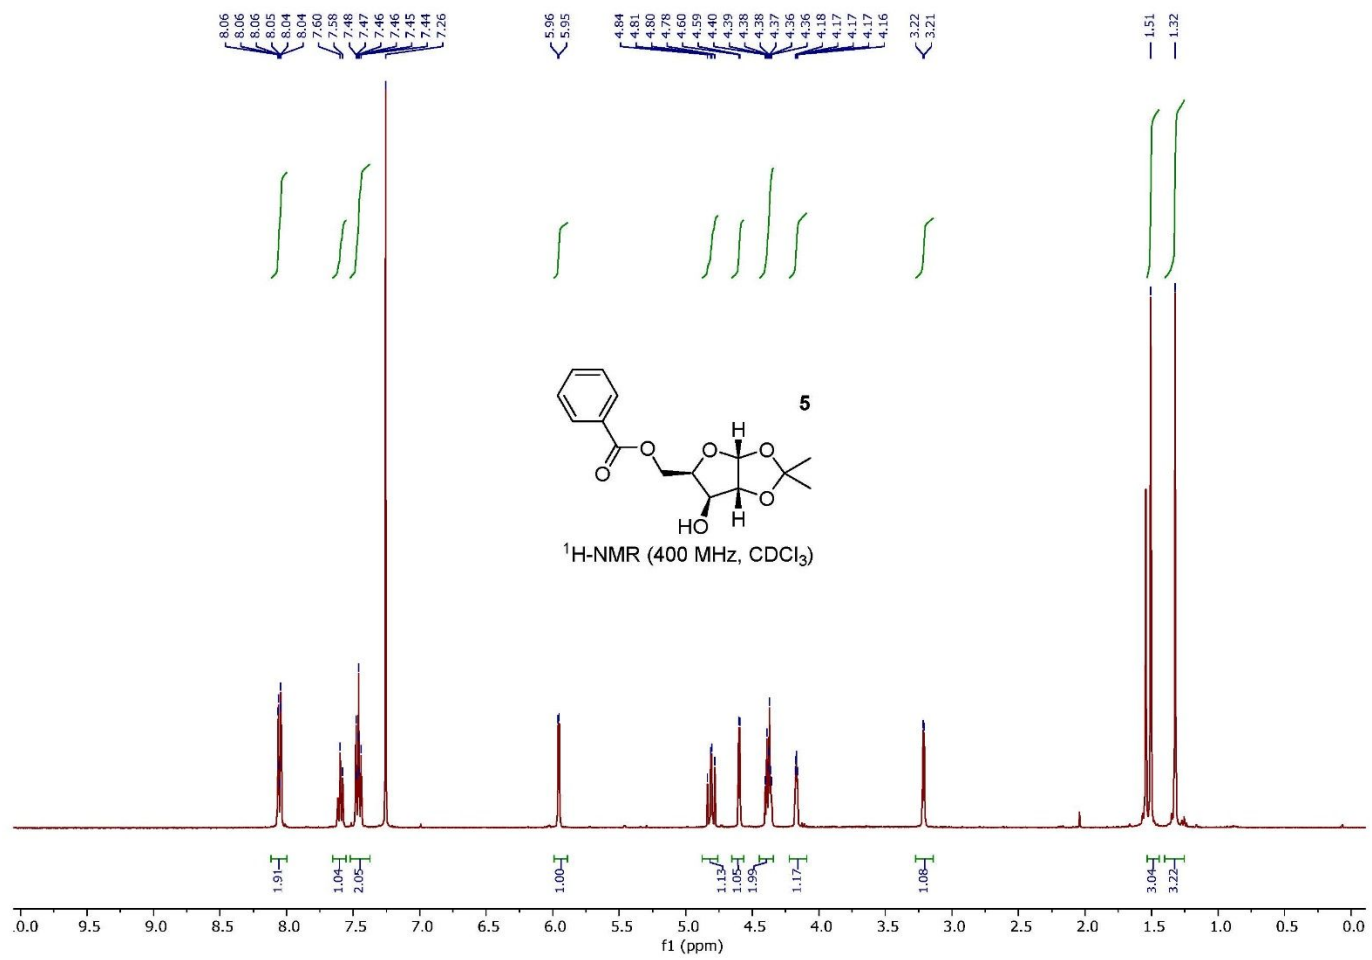

167.28

133.47  
129.80  
129.13  
128.40

111.76

104.64

84.93

78.43  
77.26  
76.94  
76.62  
74.30

61.24

26.69  
26.05

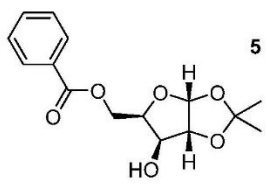

<sup>13</sup>C-NMR (100 MHz, CDCl<sub>3</sub>)

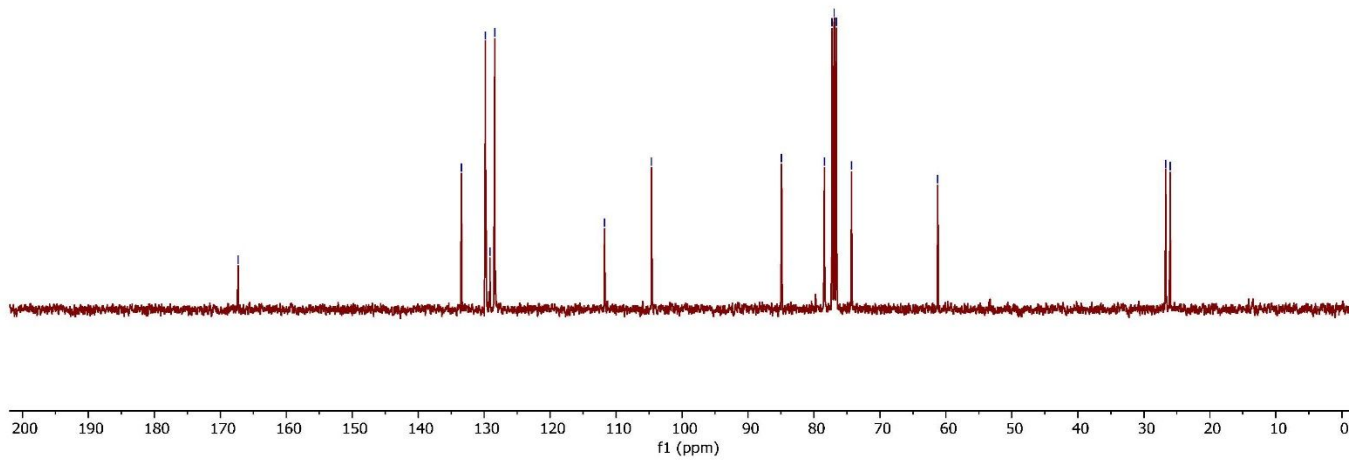

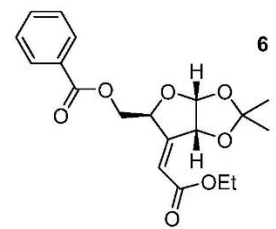

<sup>1</sup>H-NMR (400 MHz, CDCl<sub>3</sub>)

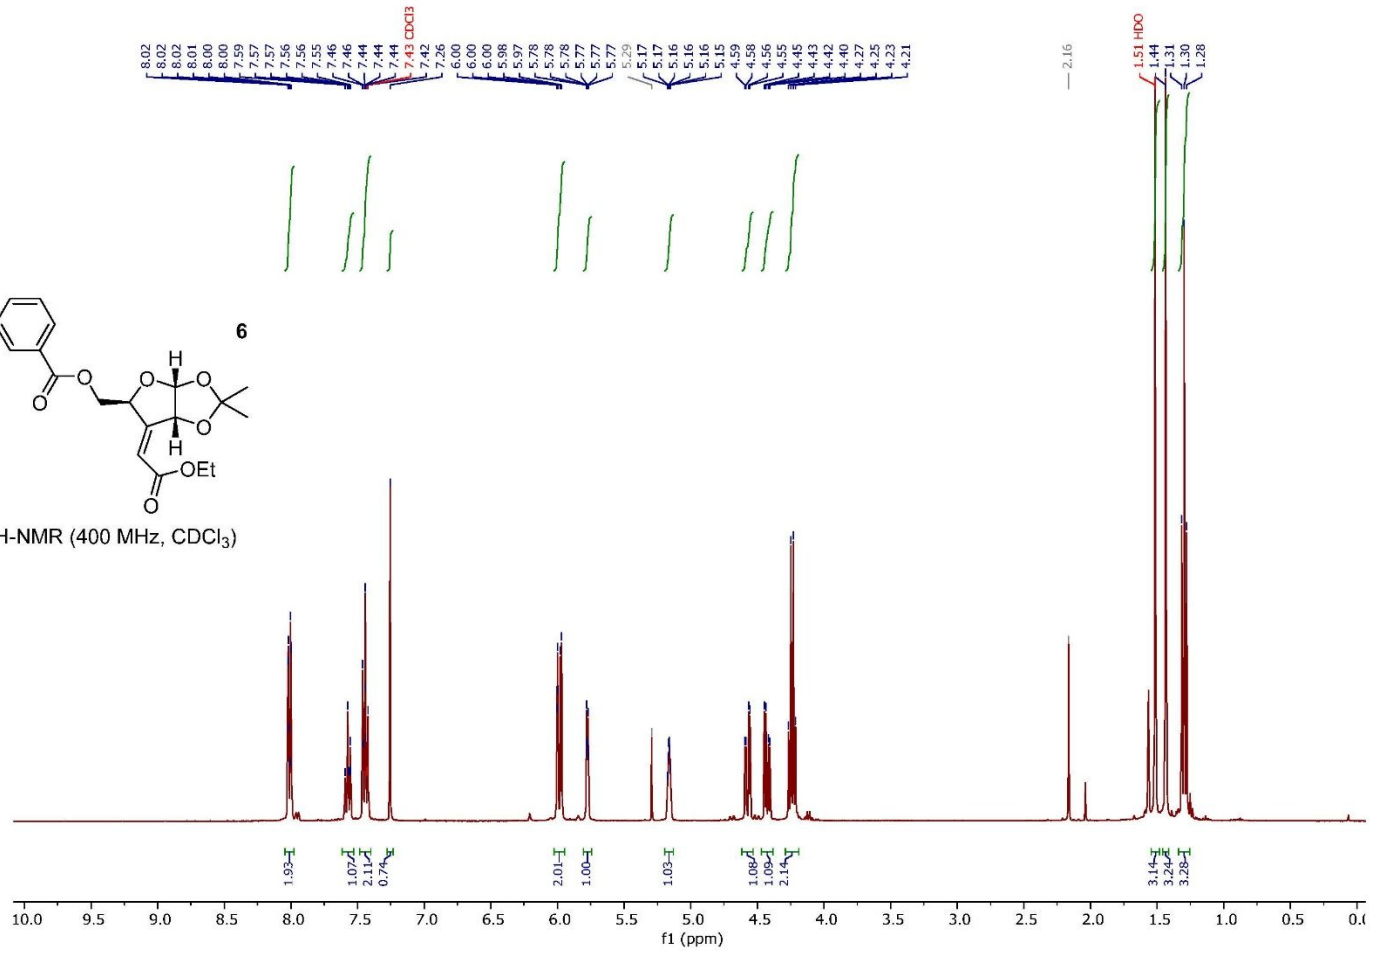

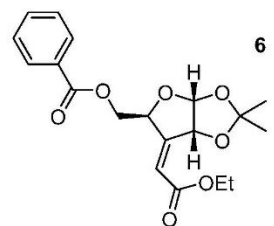

$^{13}\text{C-NMR}$  (100 MHz,  $\text{CDCl}_3$ )

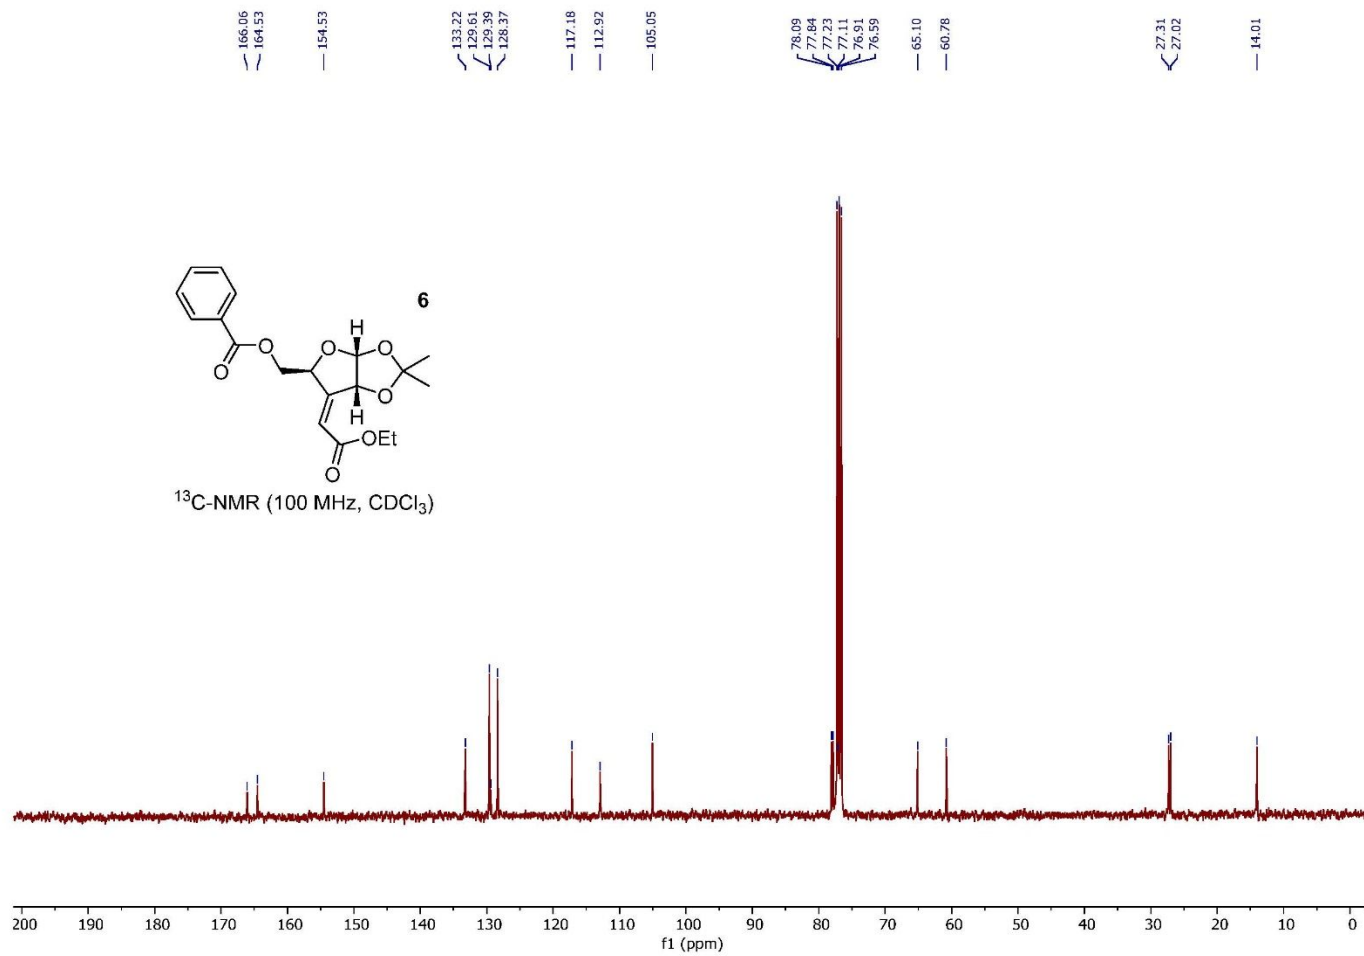

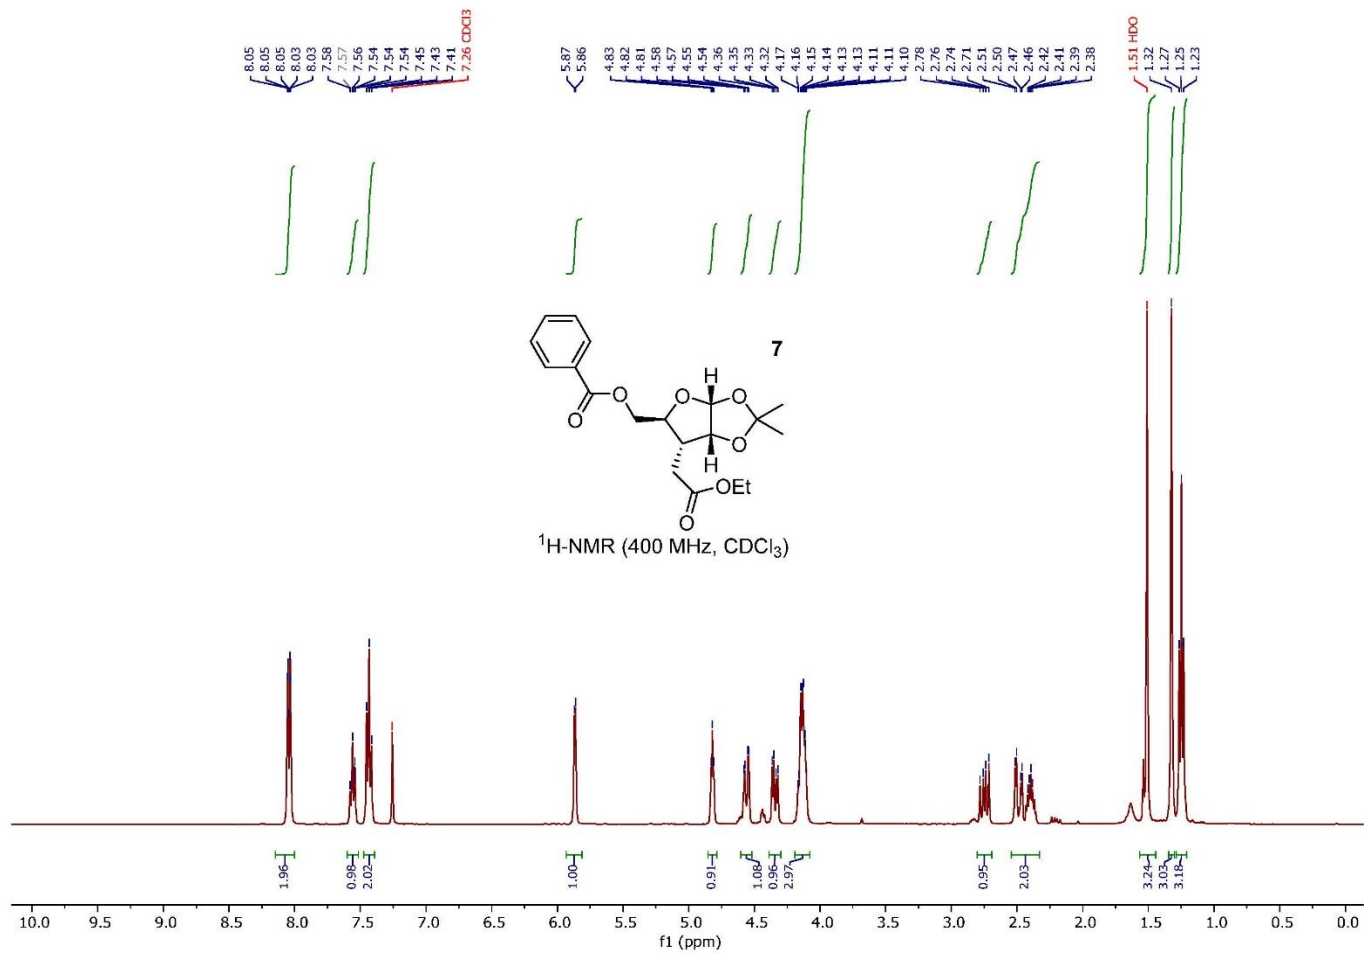

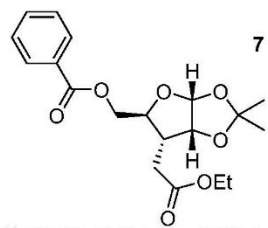

$^{13}\text{C-NMR}$  (100 MHz,  $\text{CDCl}_3$ )

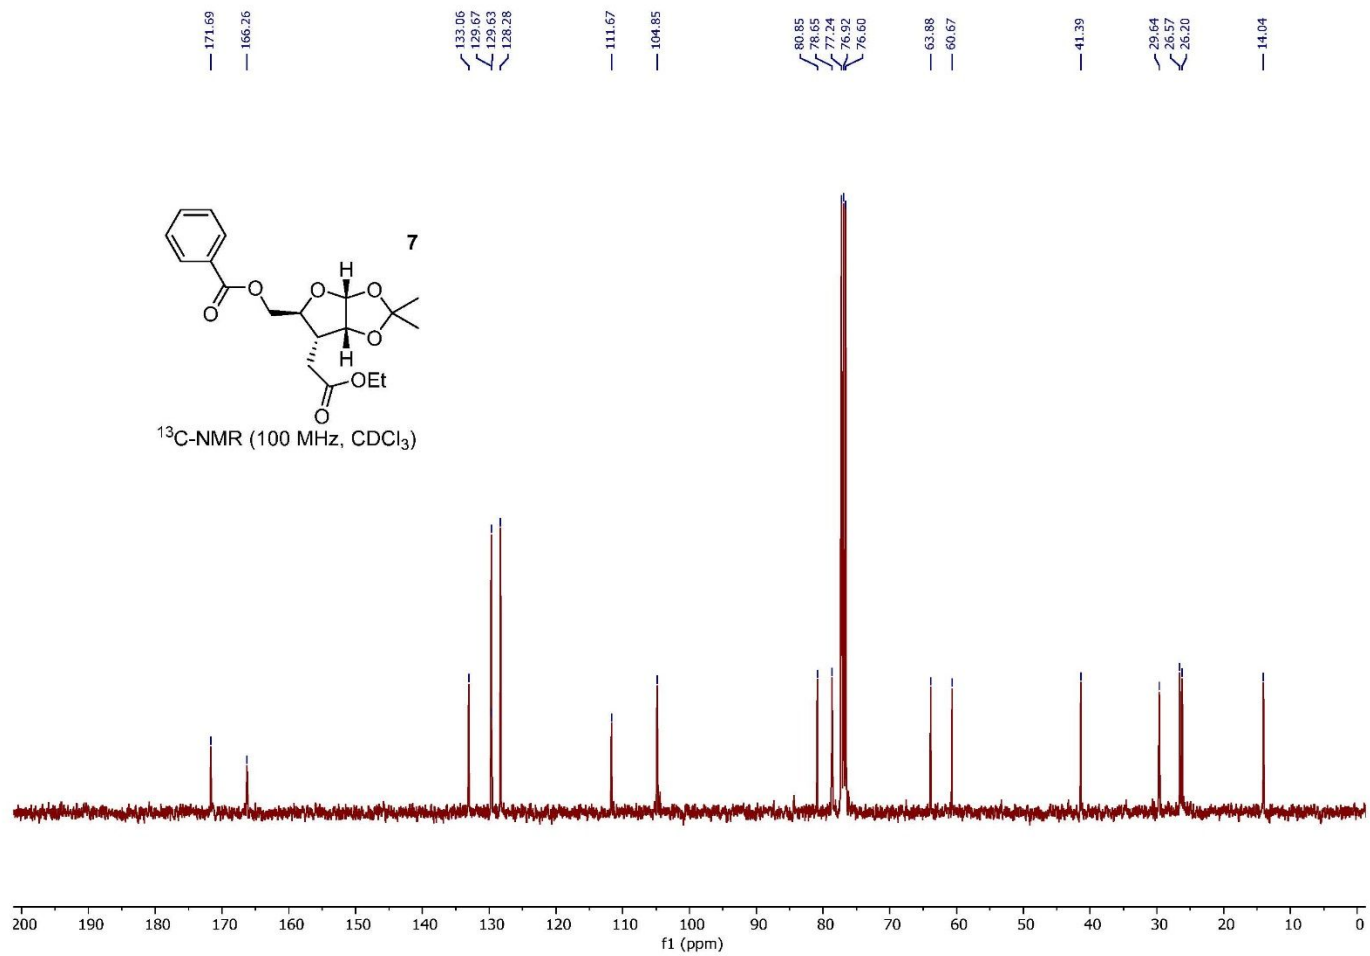

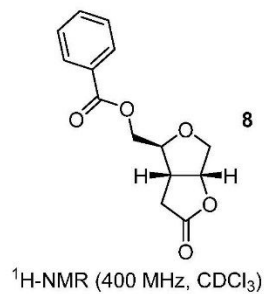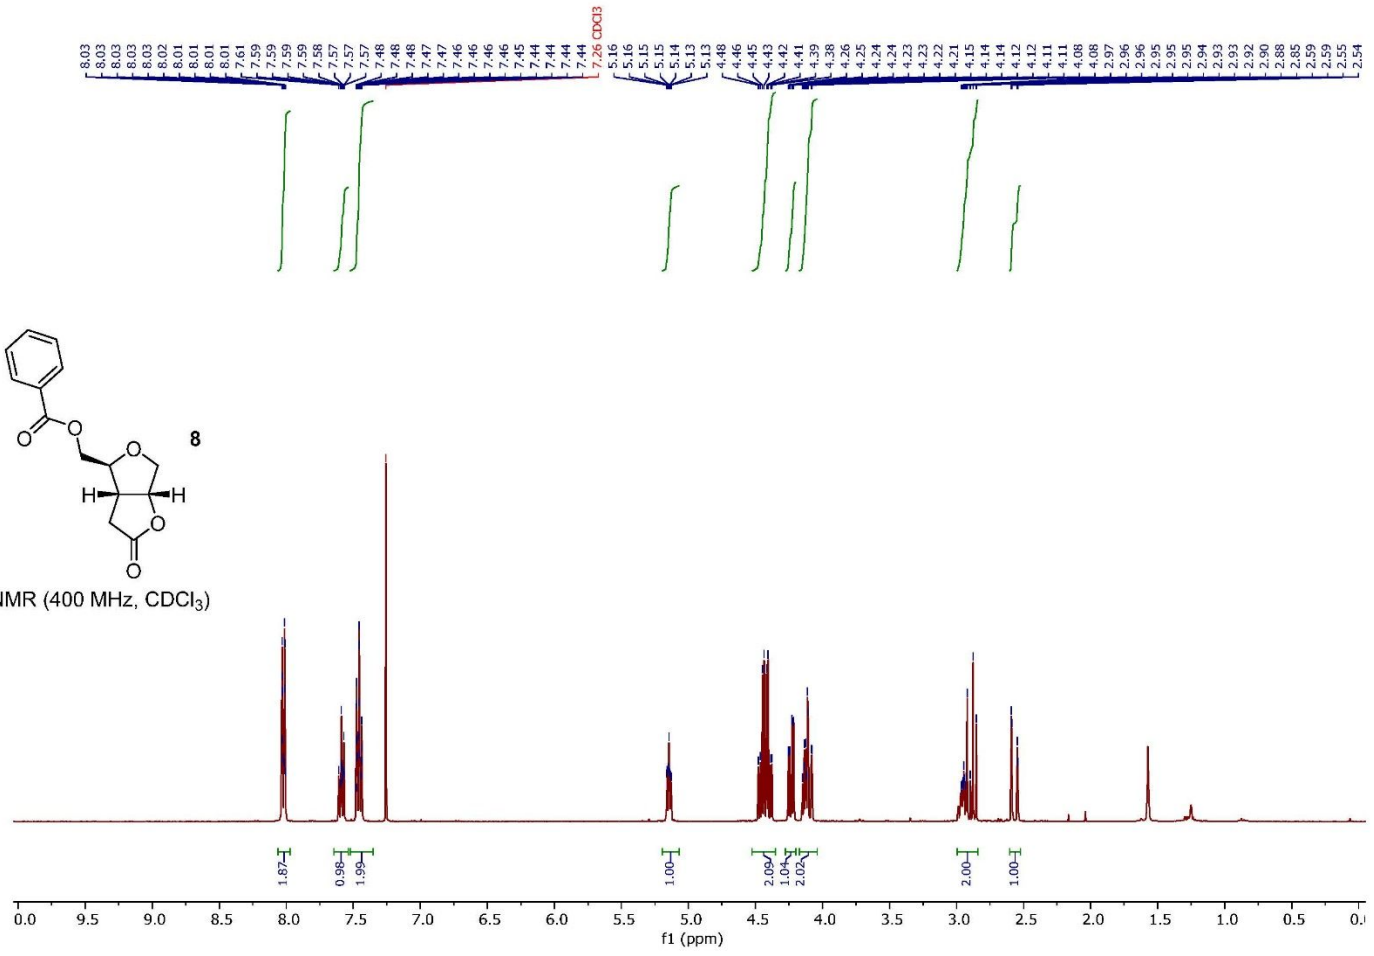



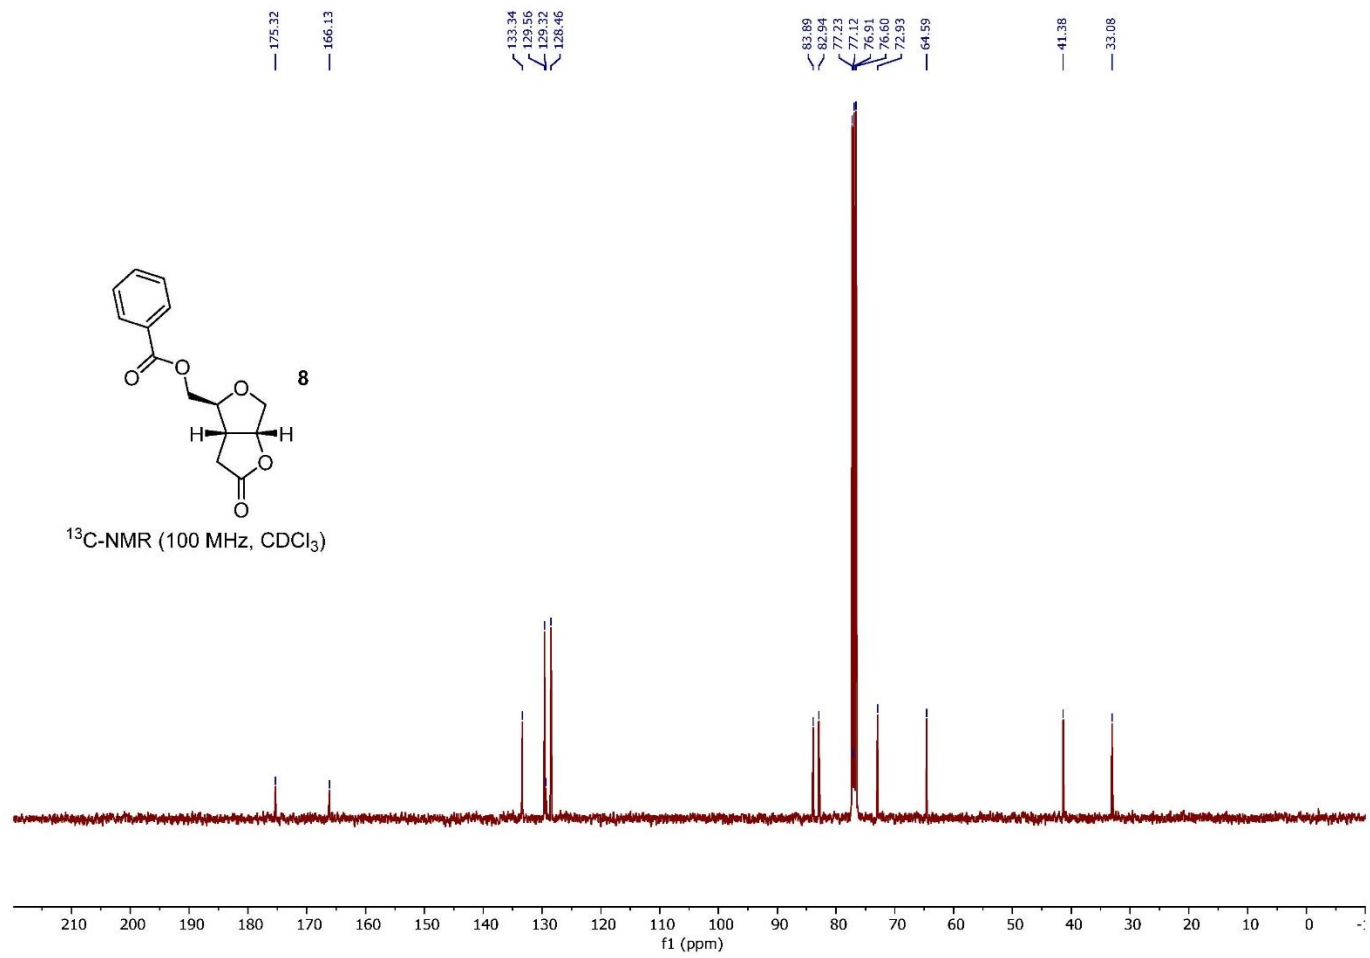

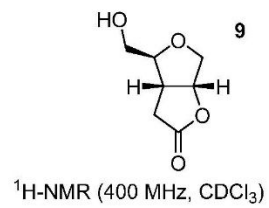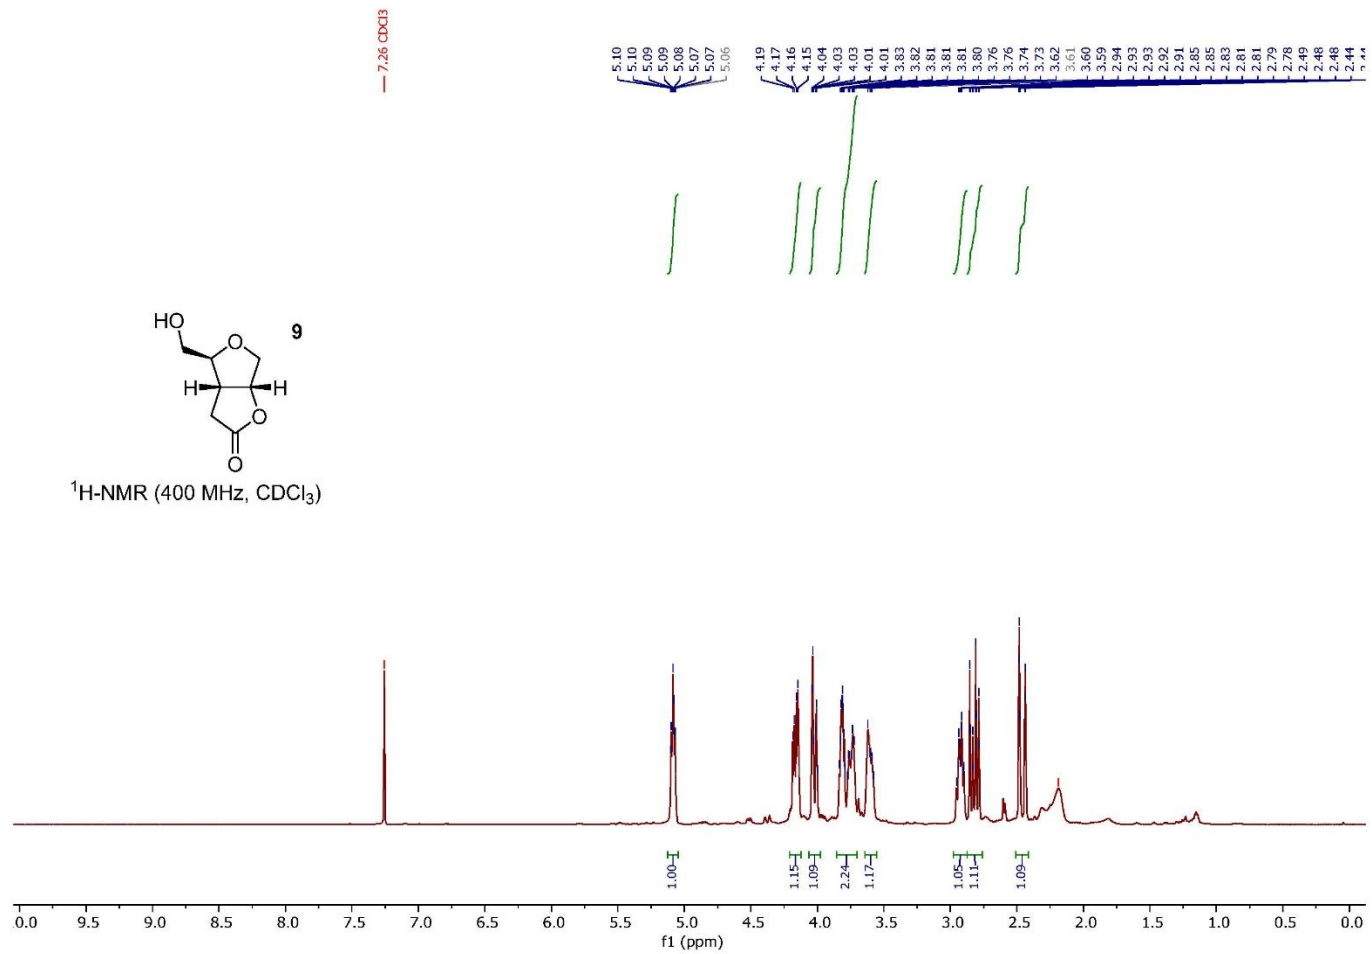

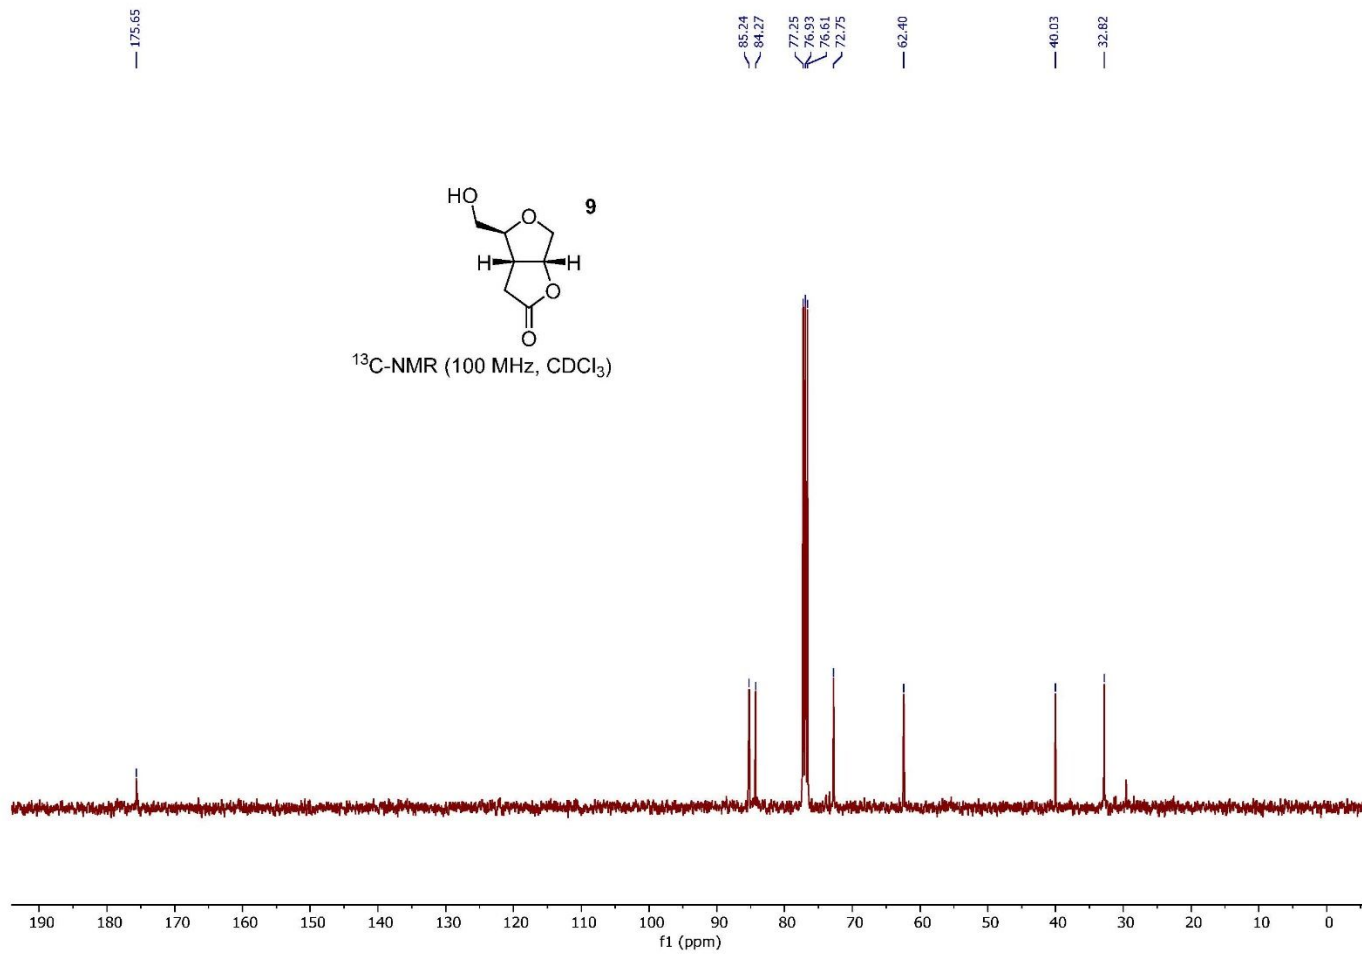

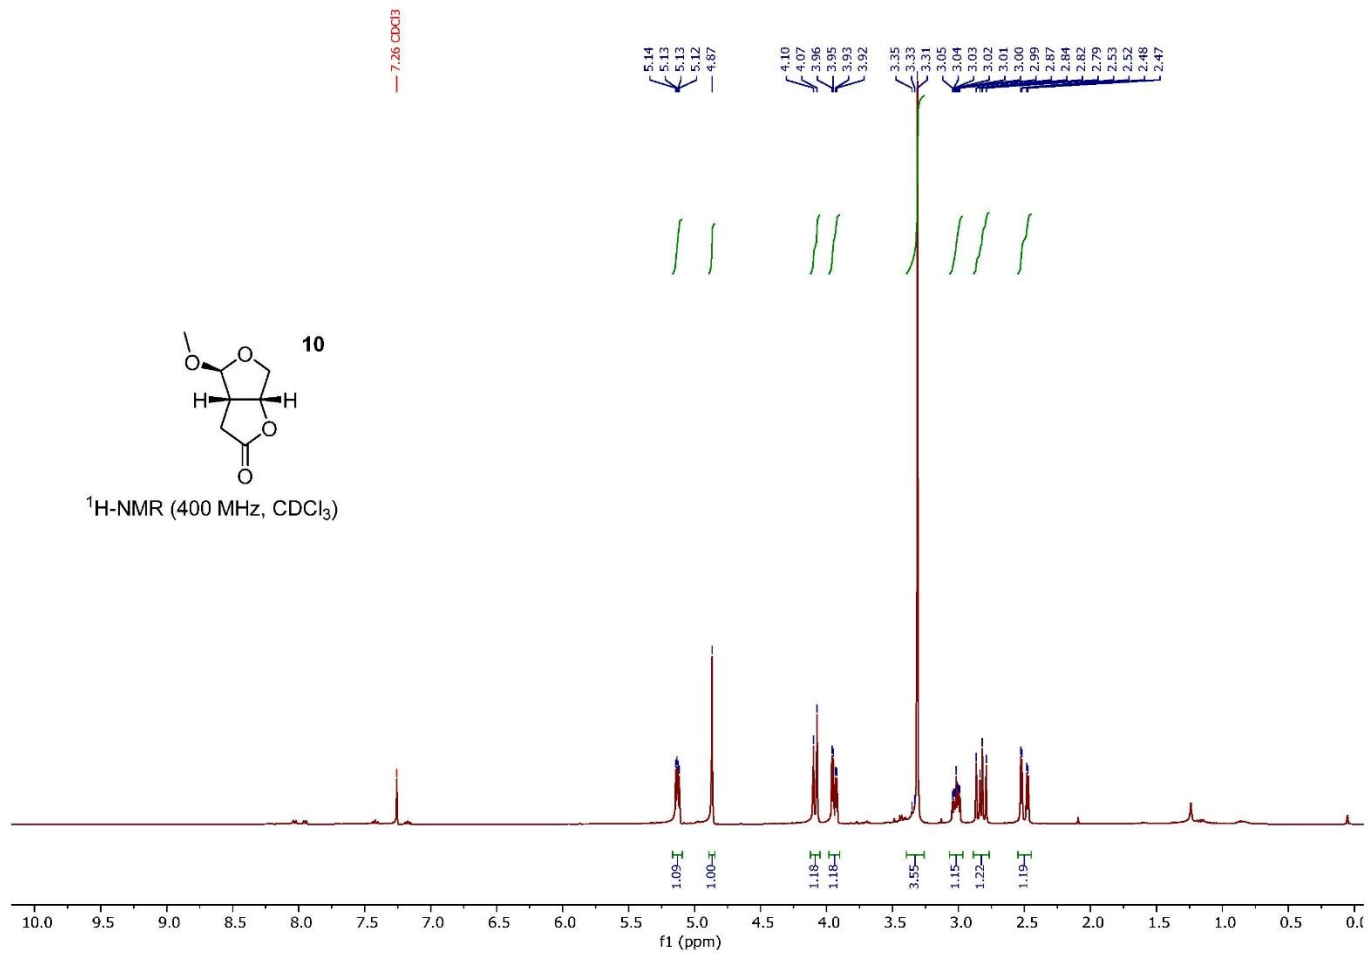

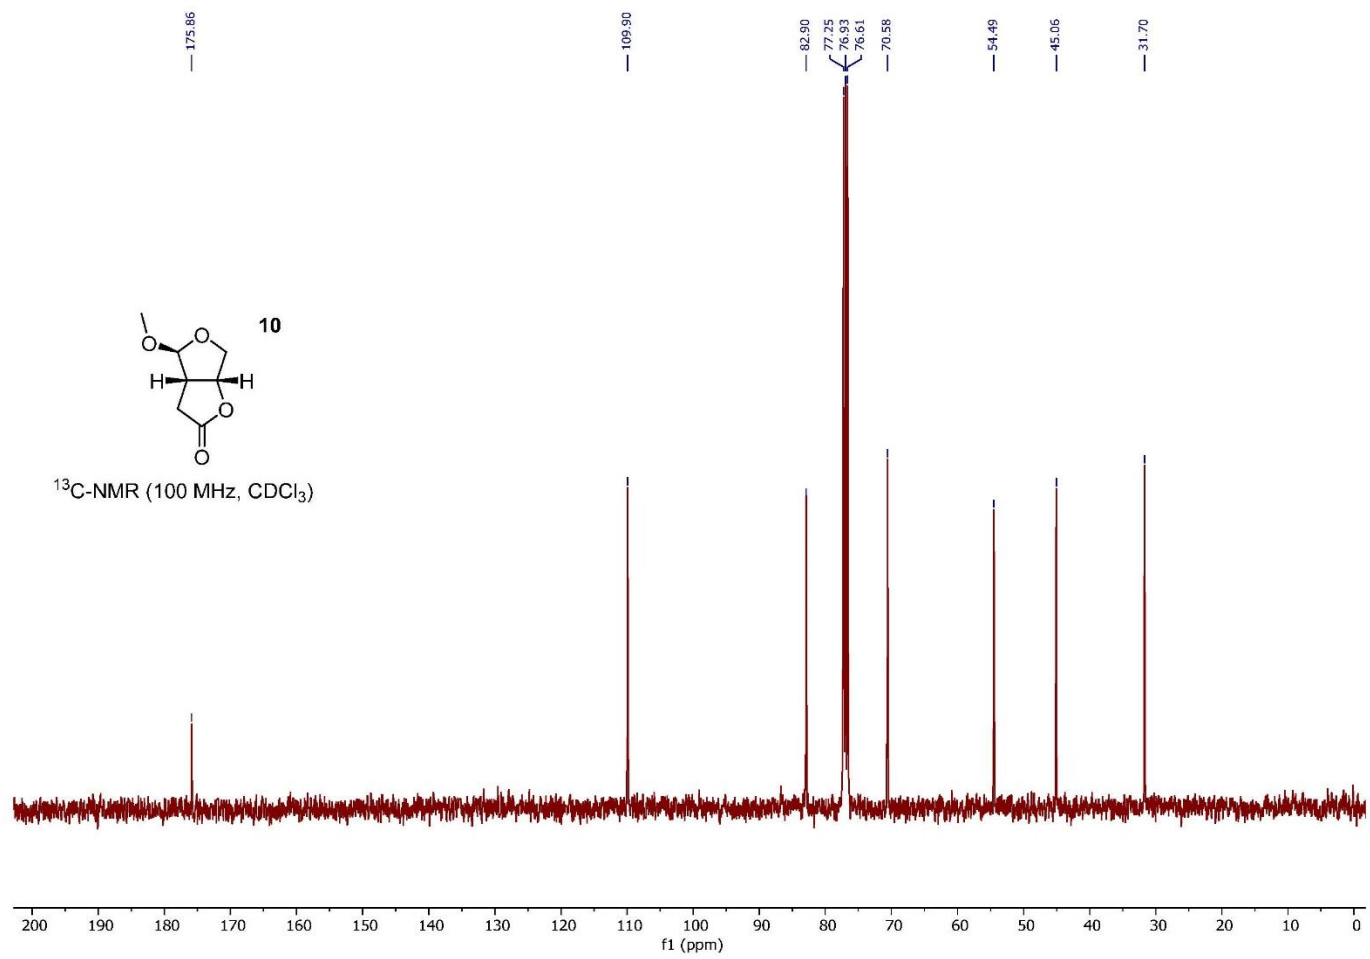

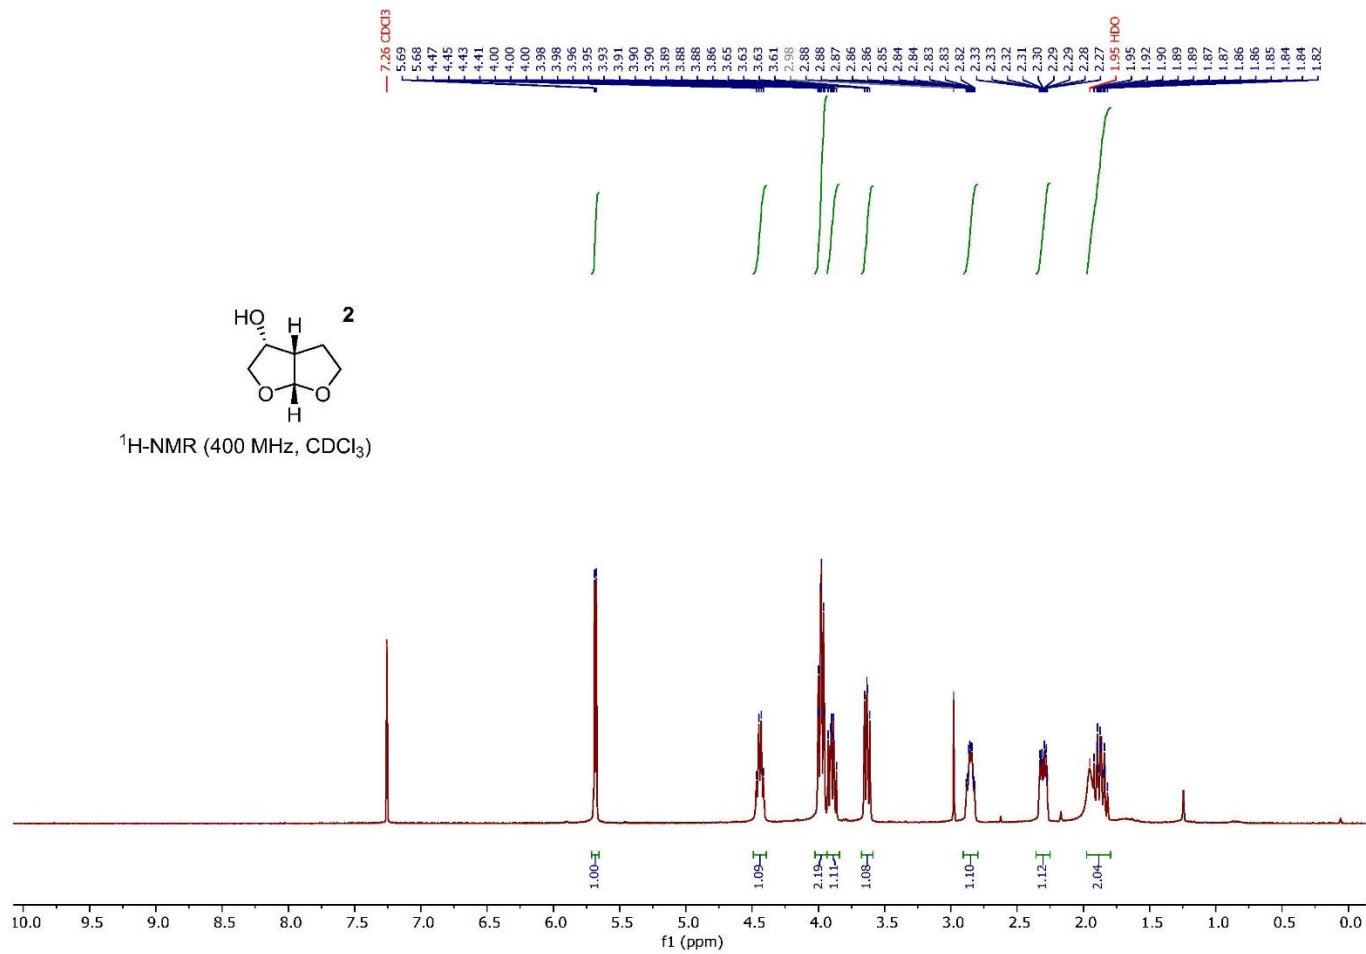

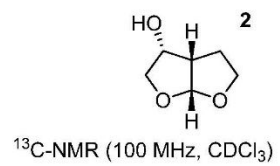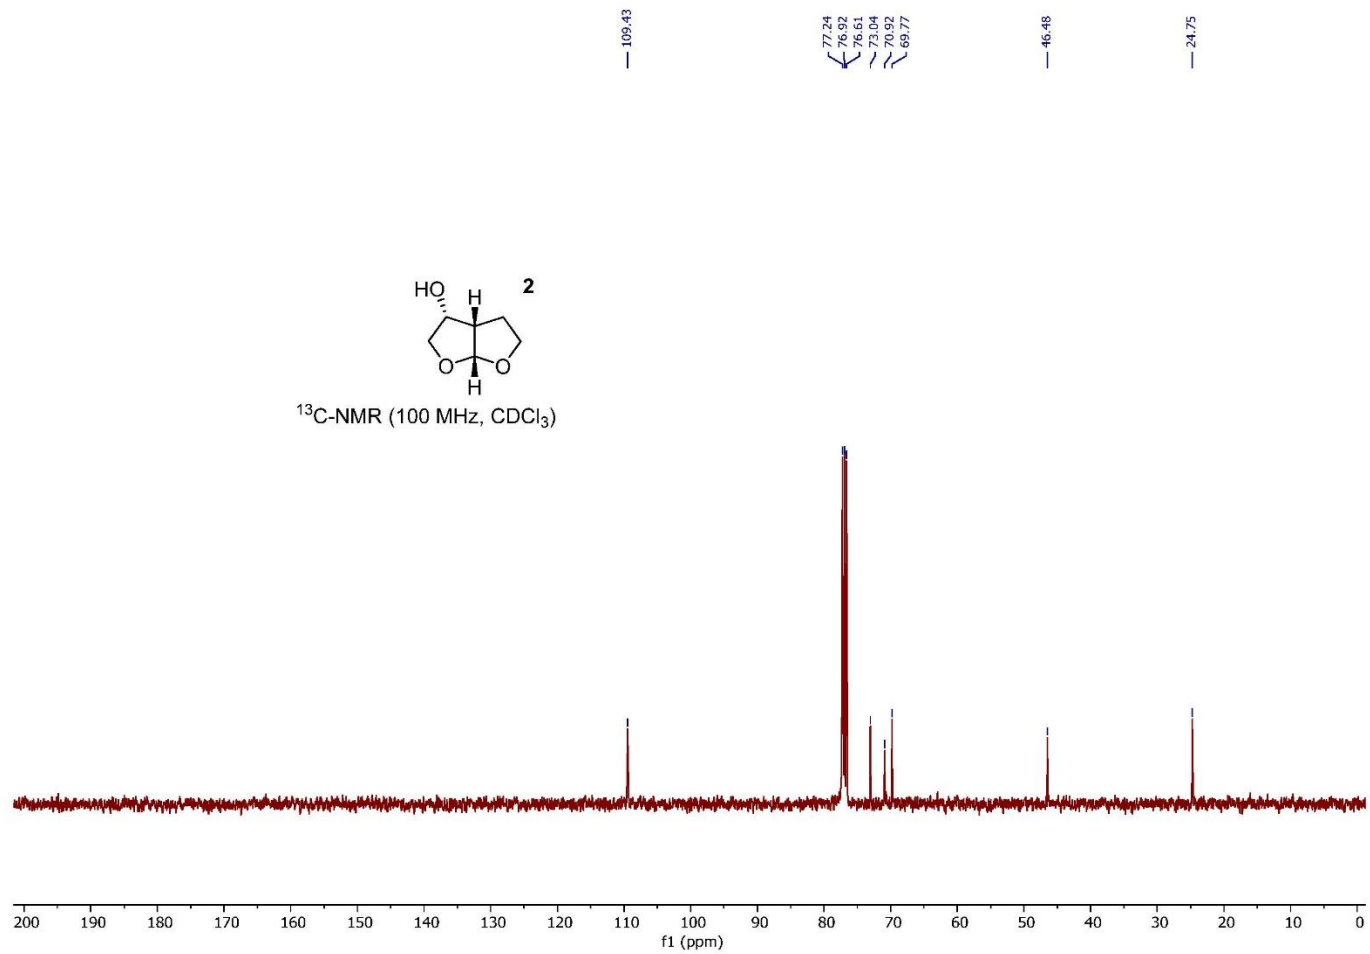

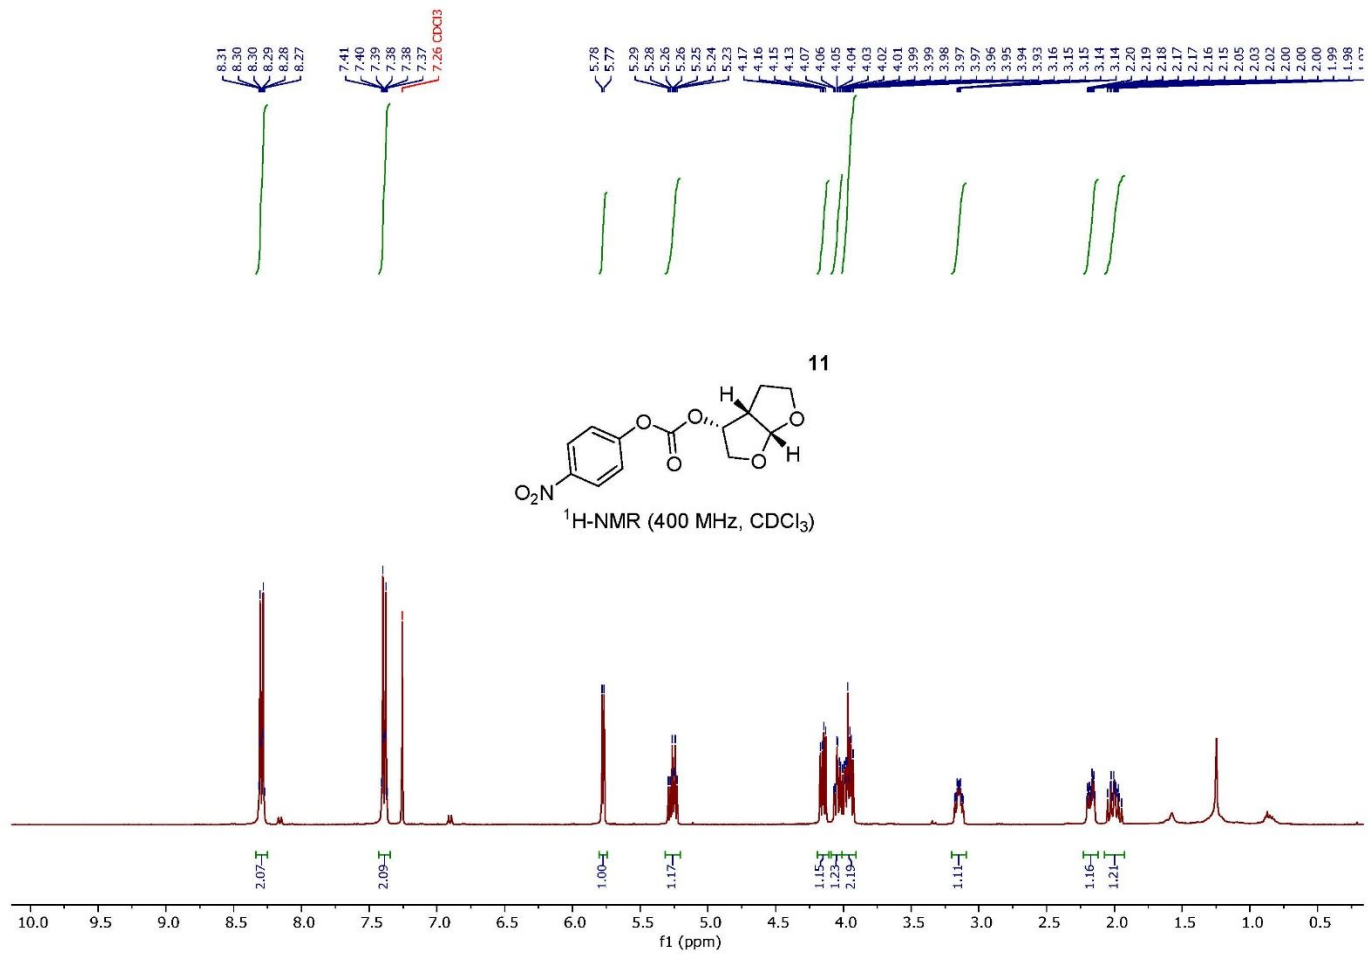



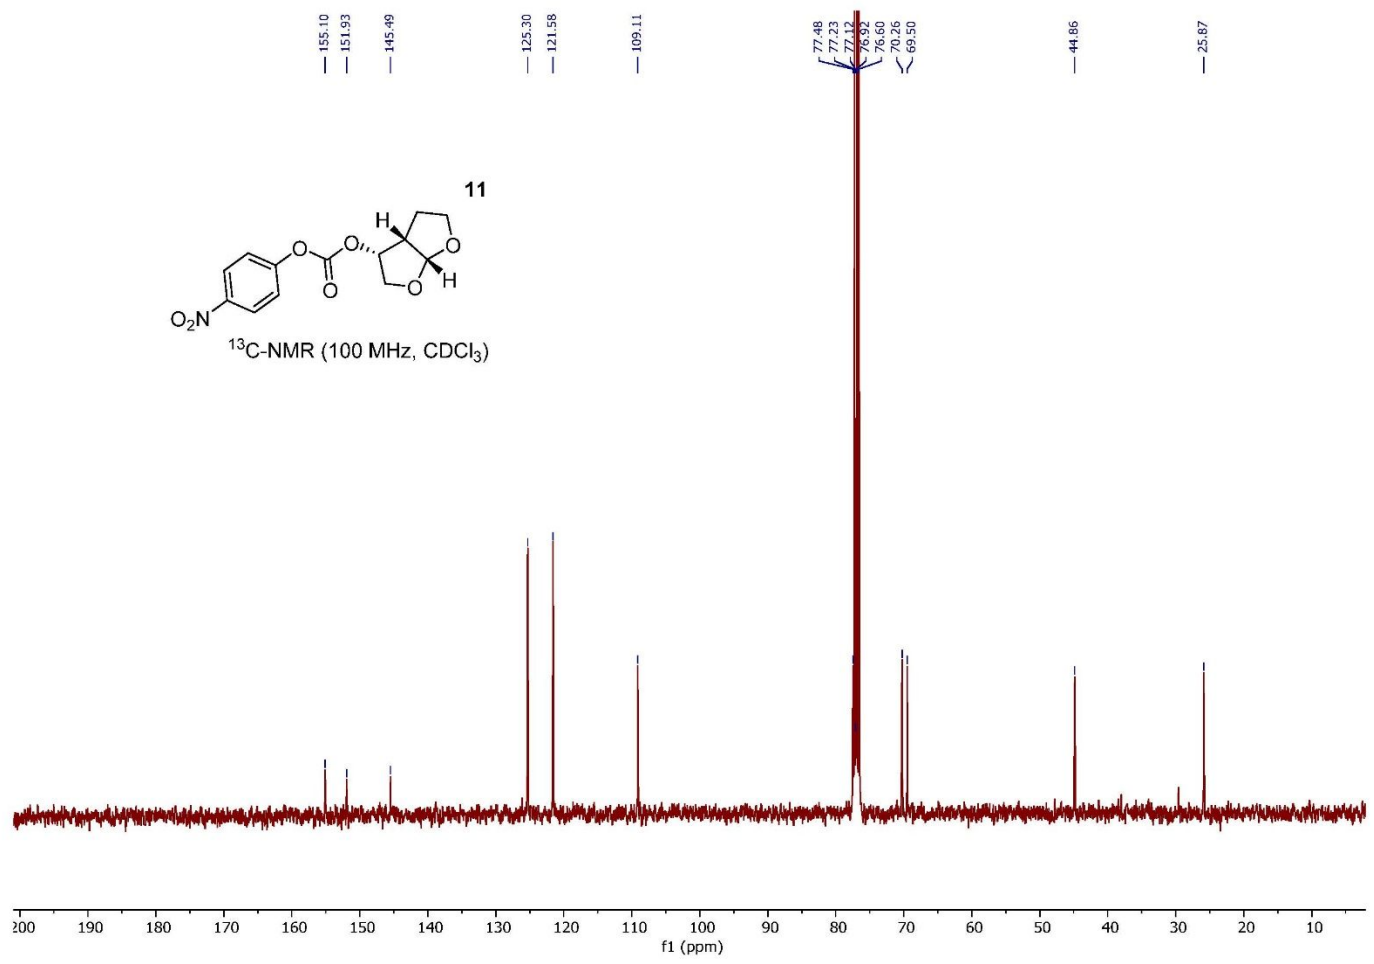

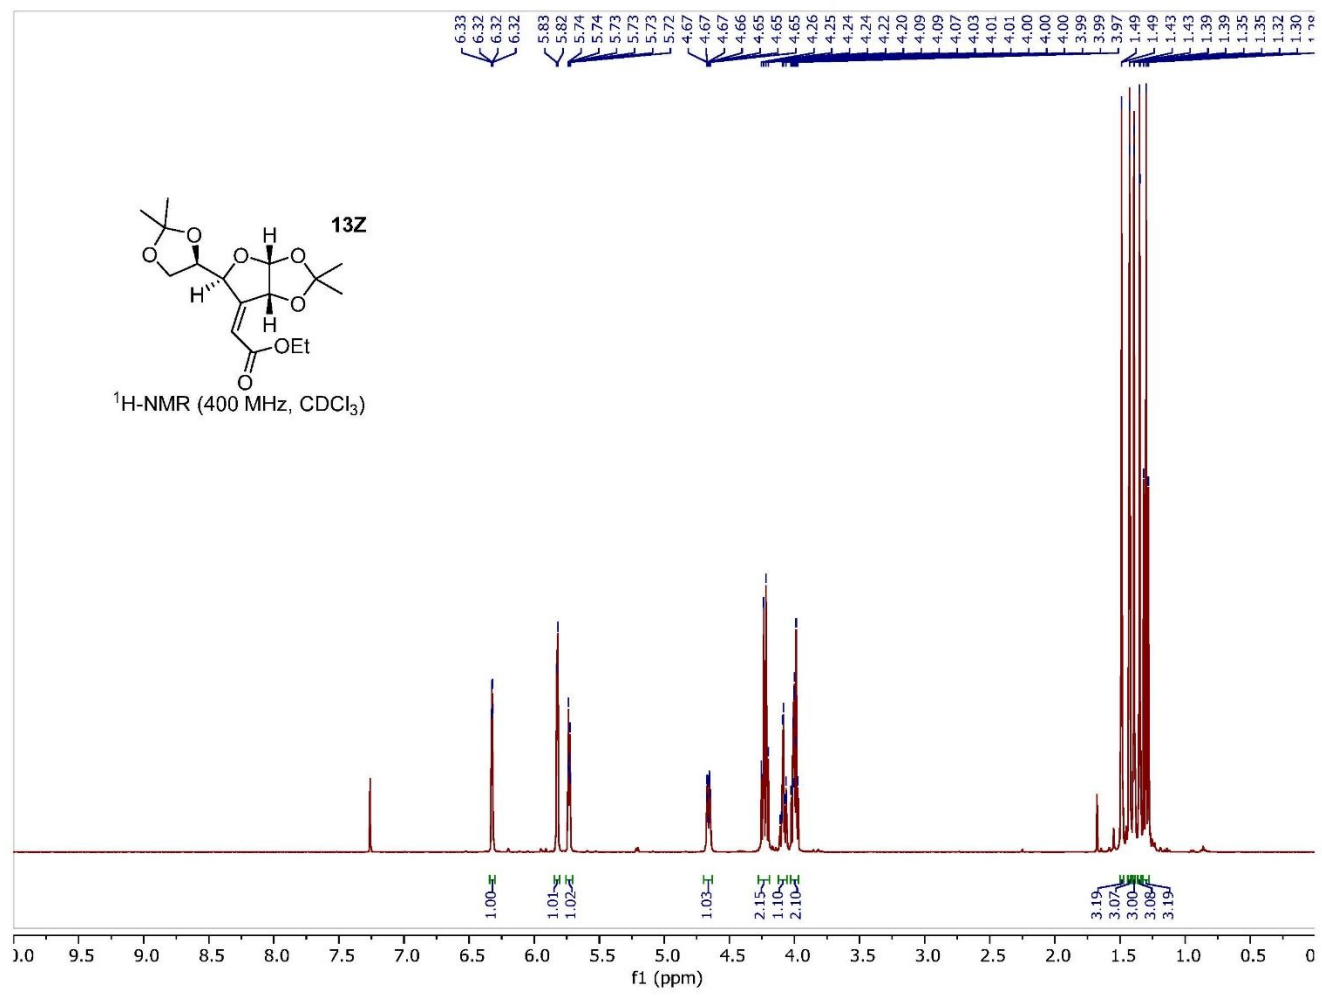

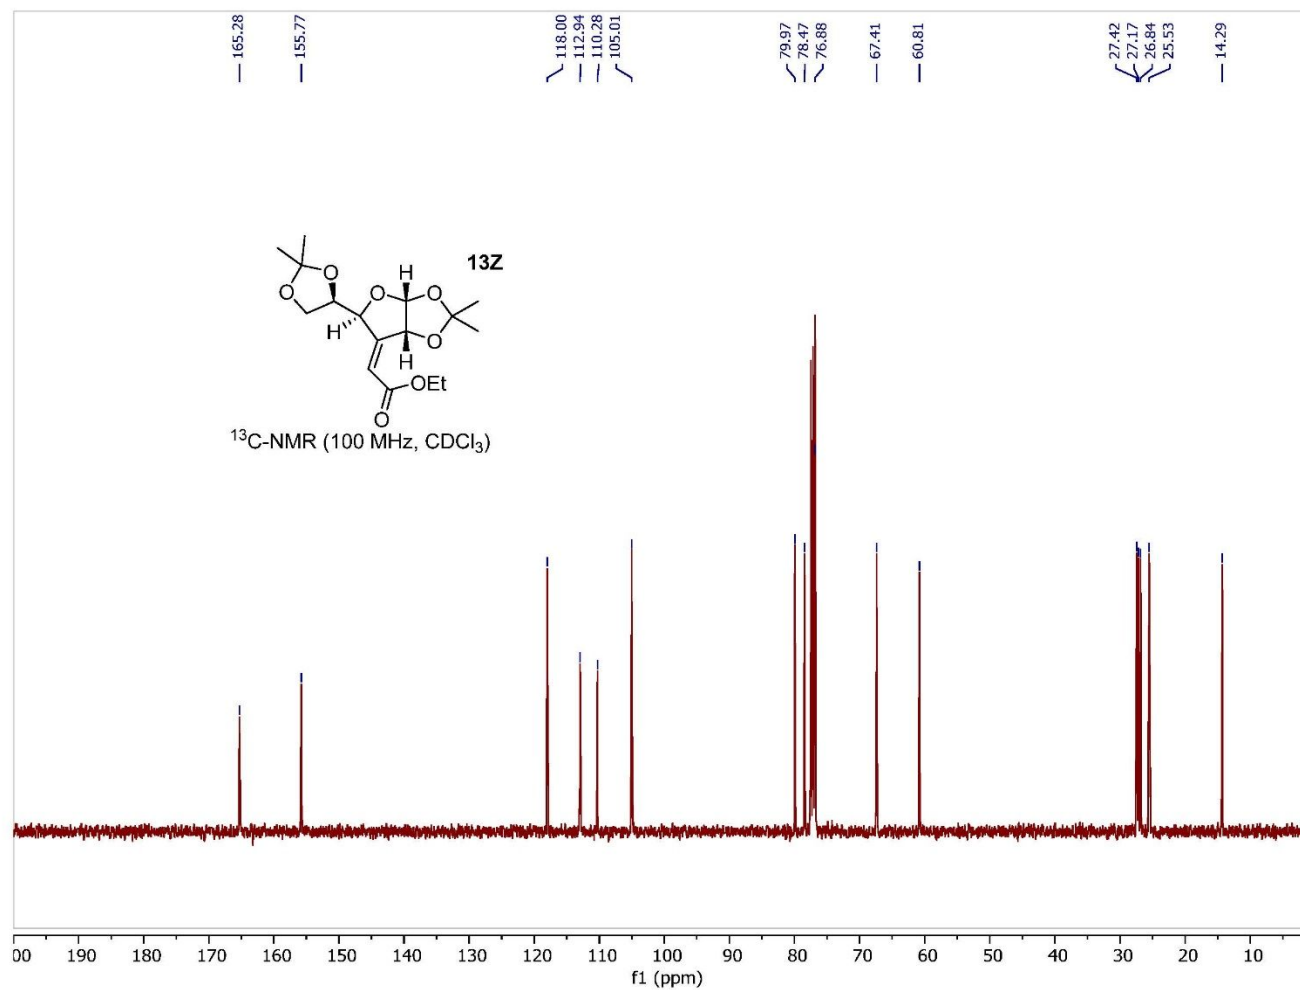

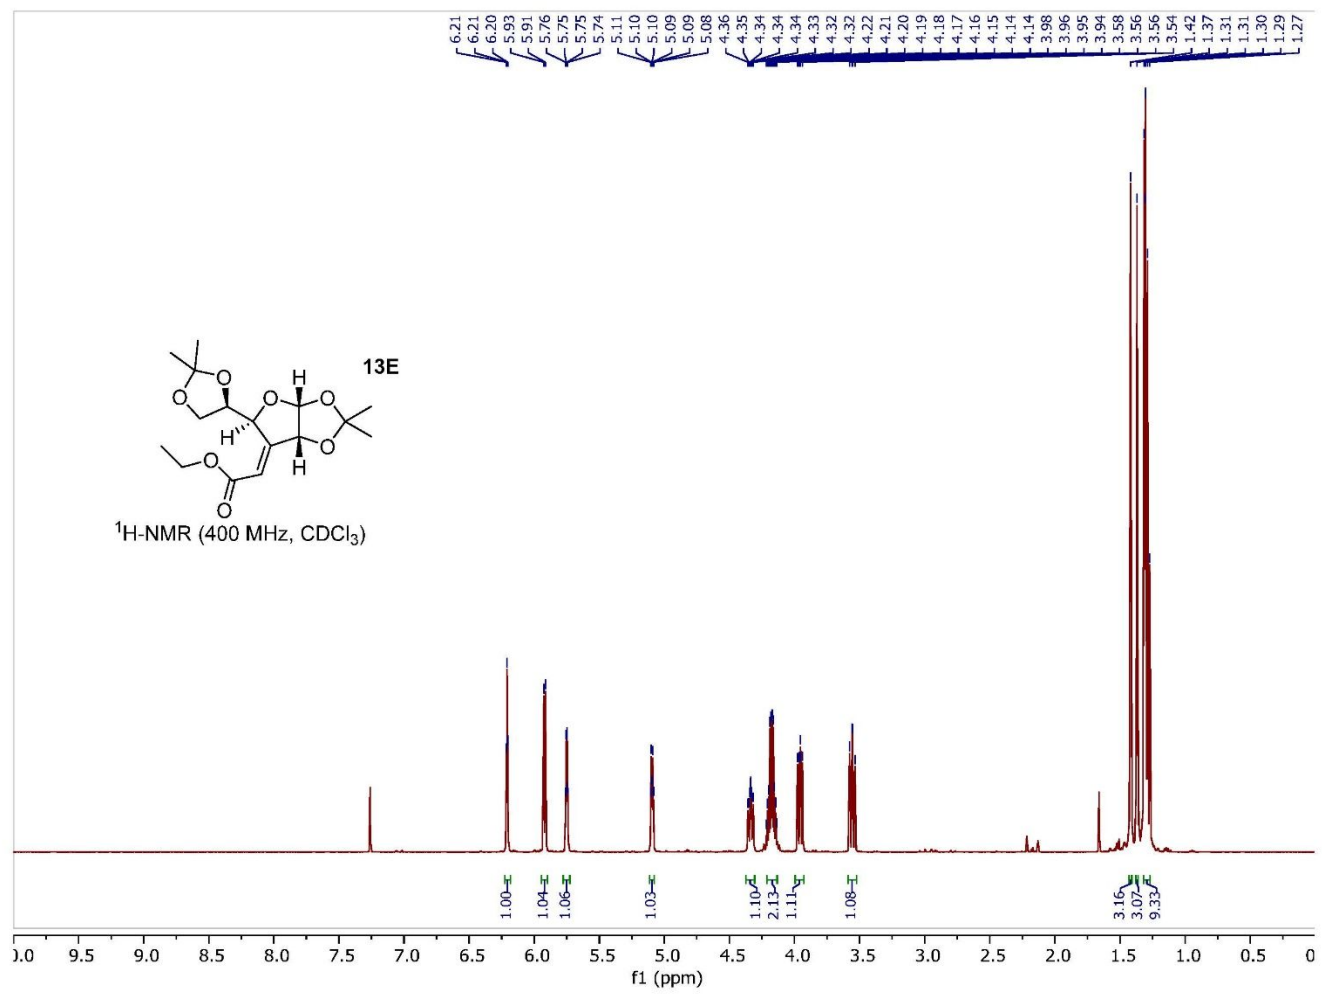

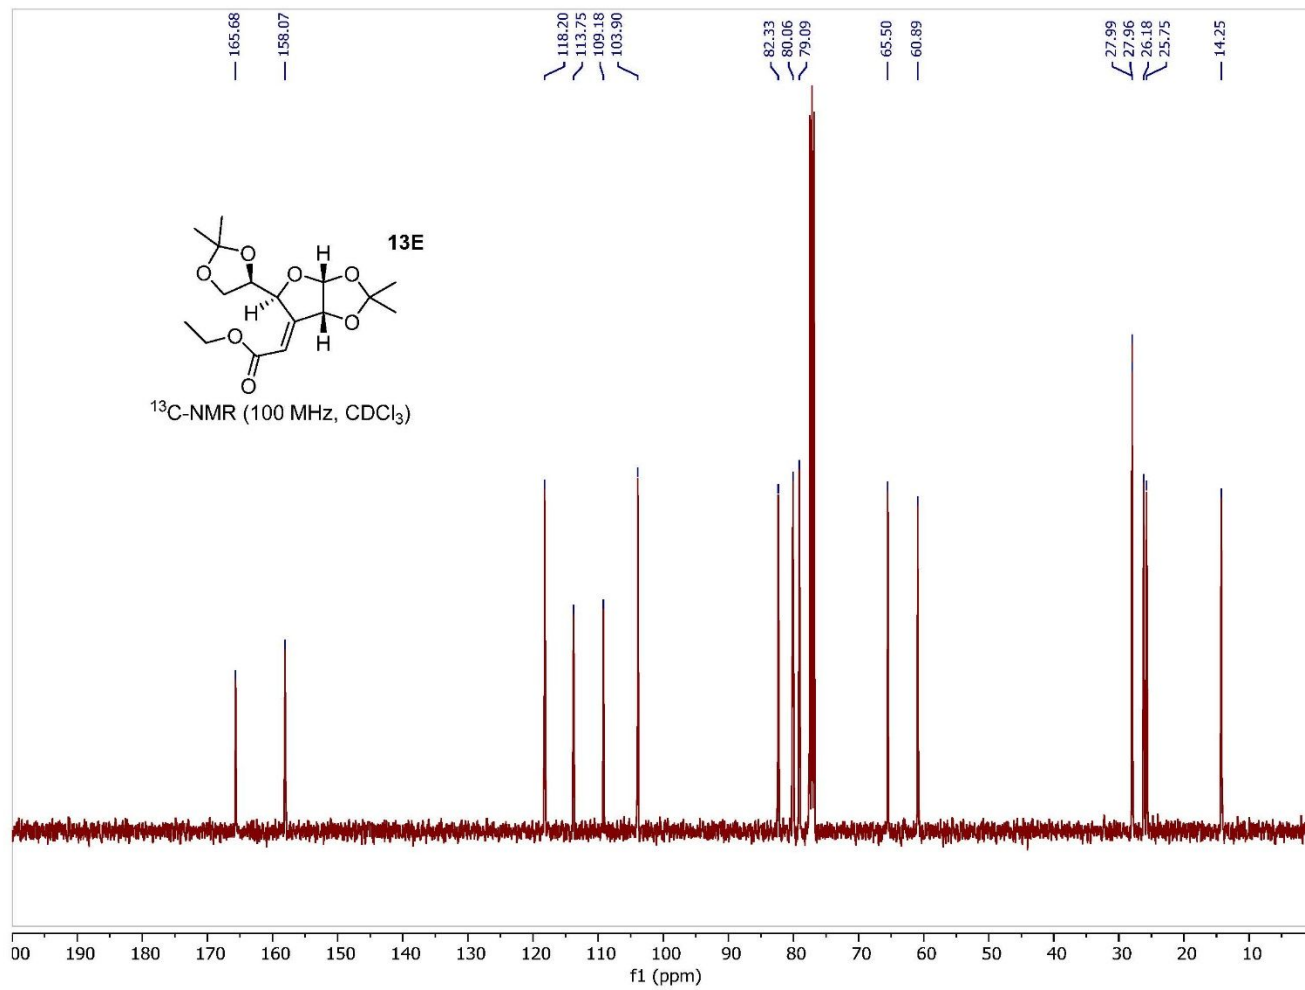

S21

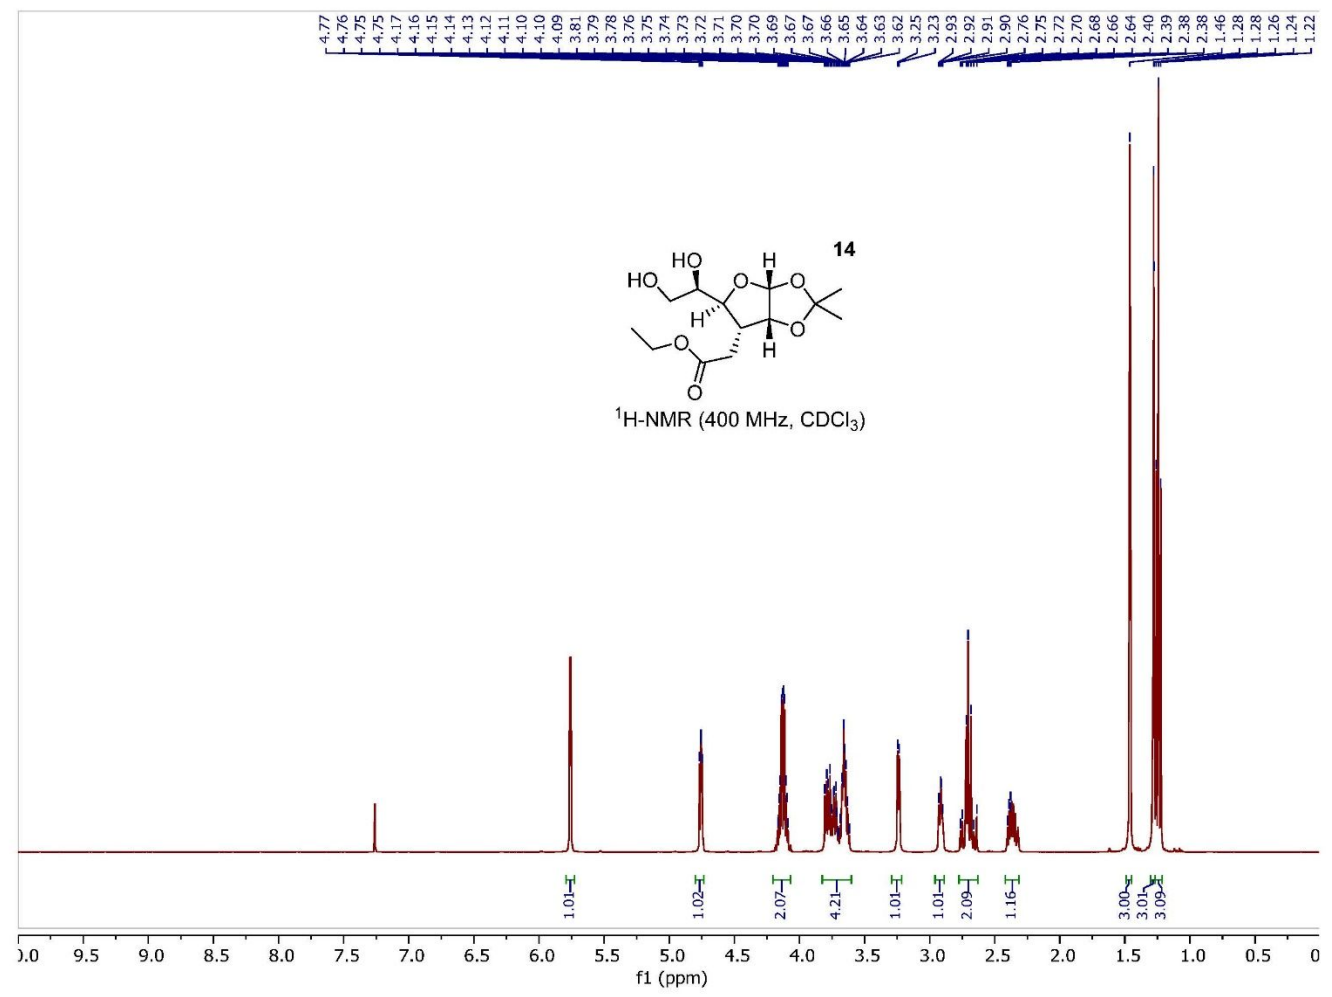

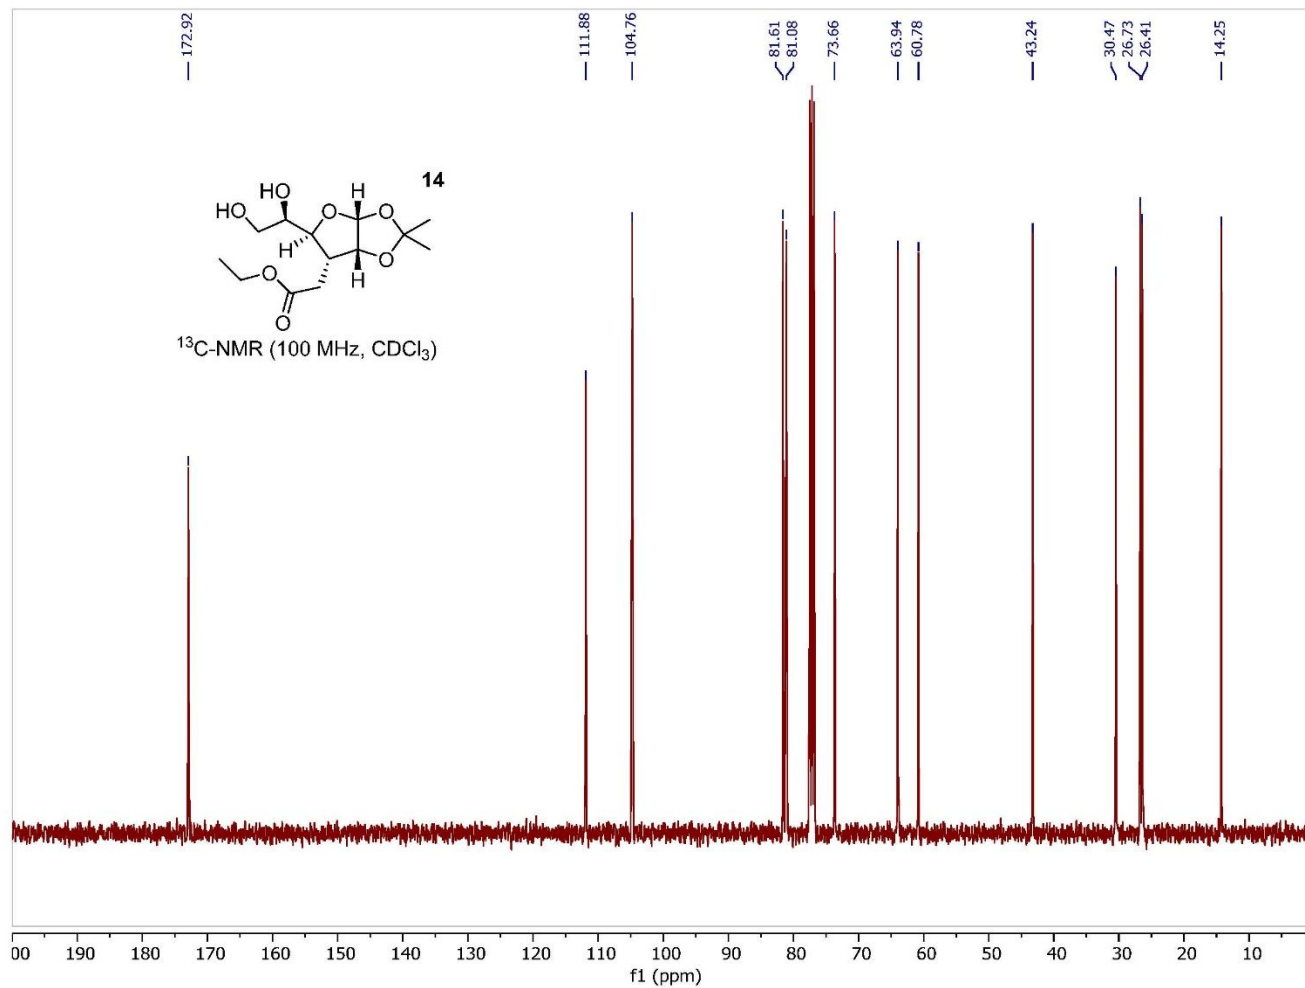

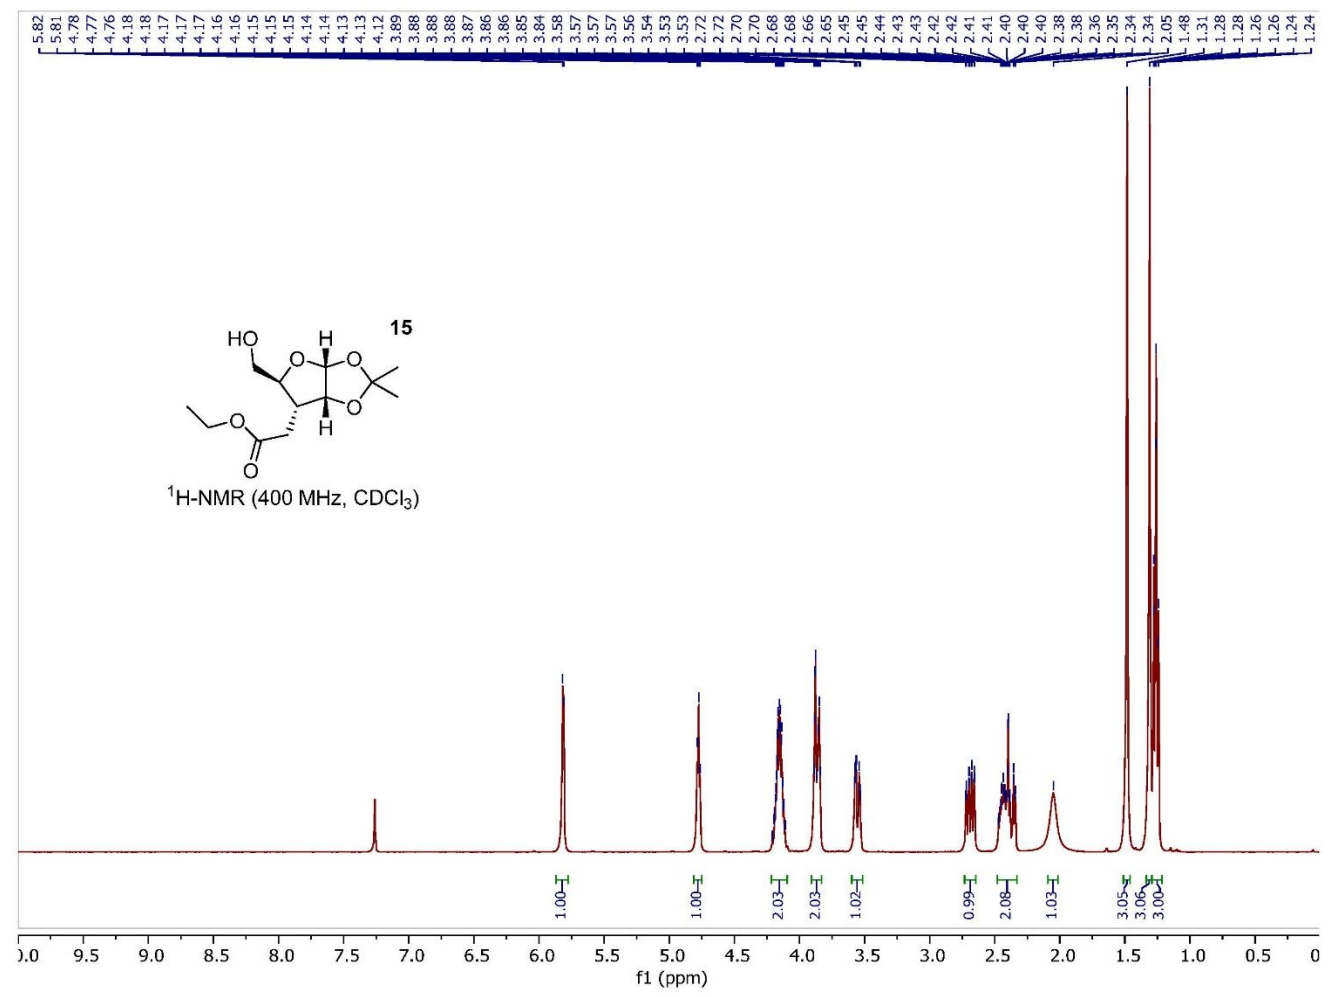



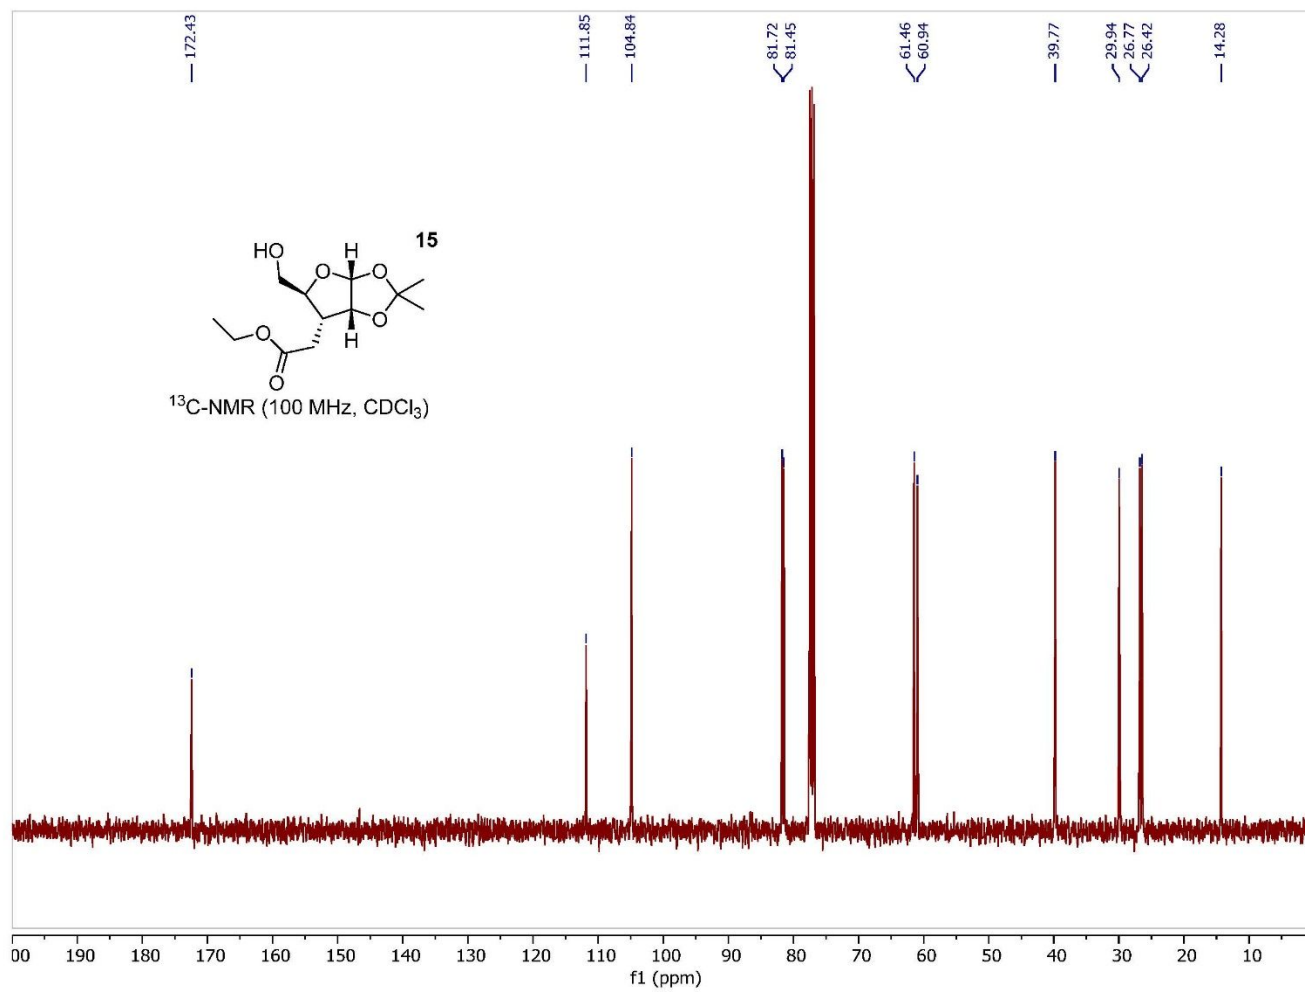

S25

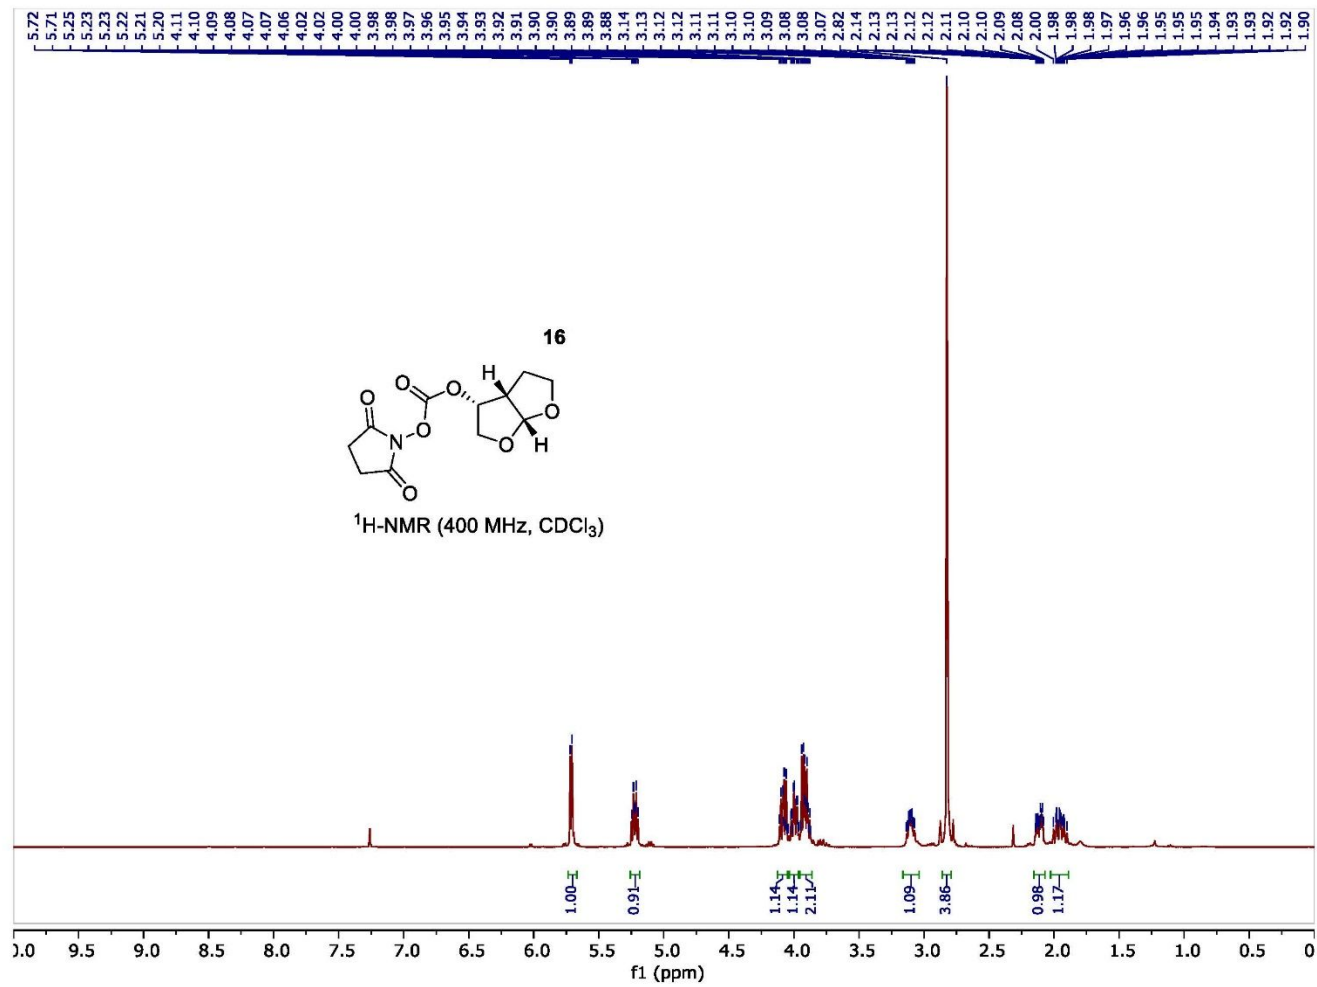

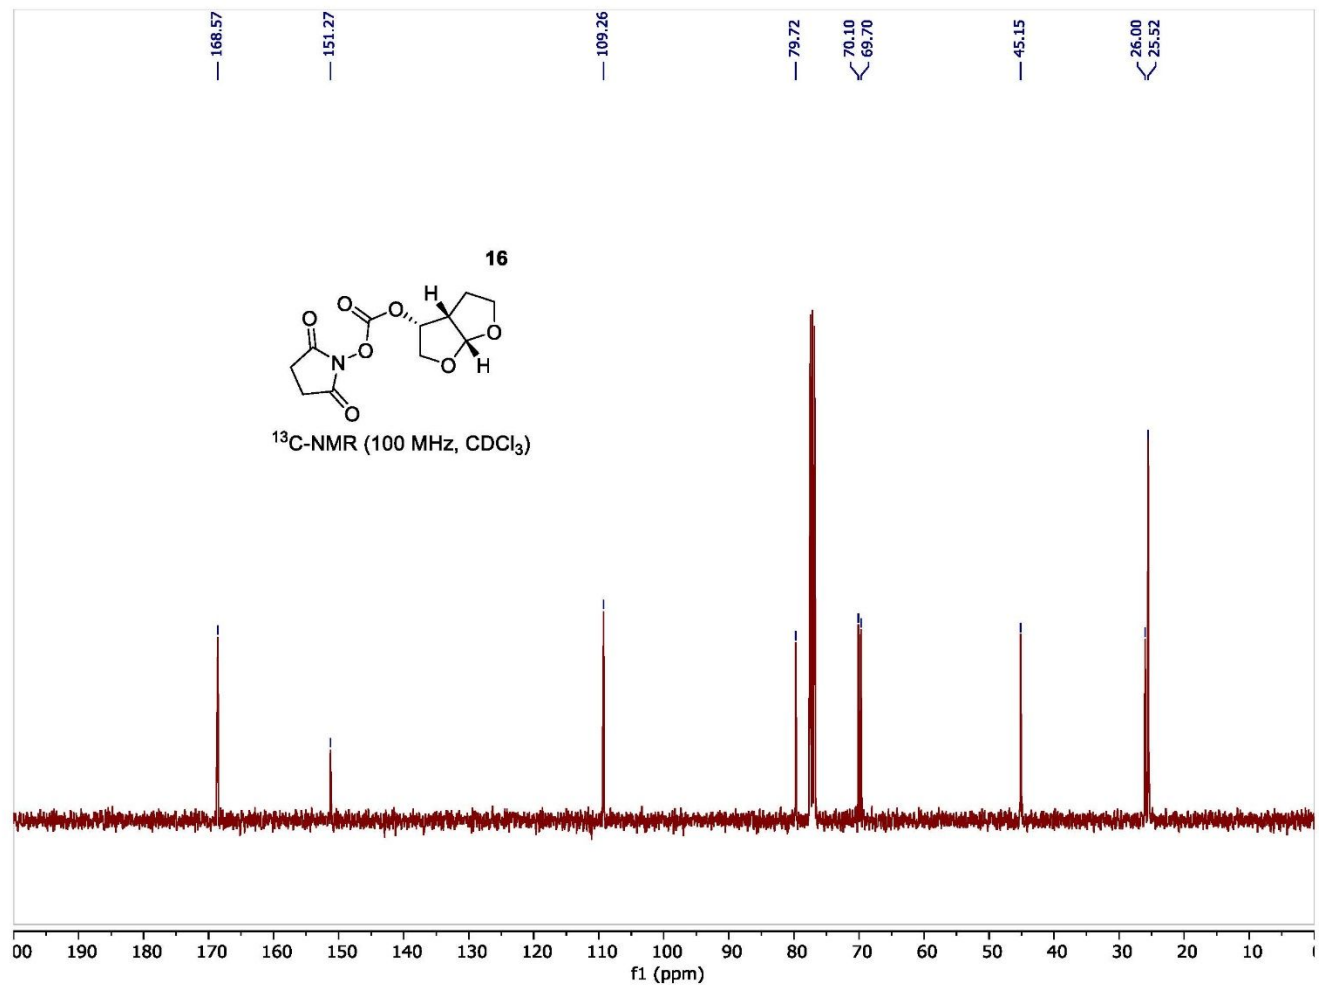

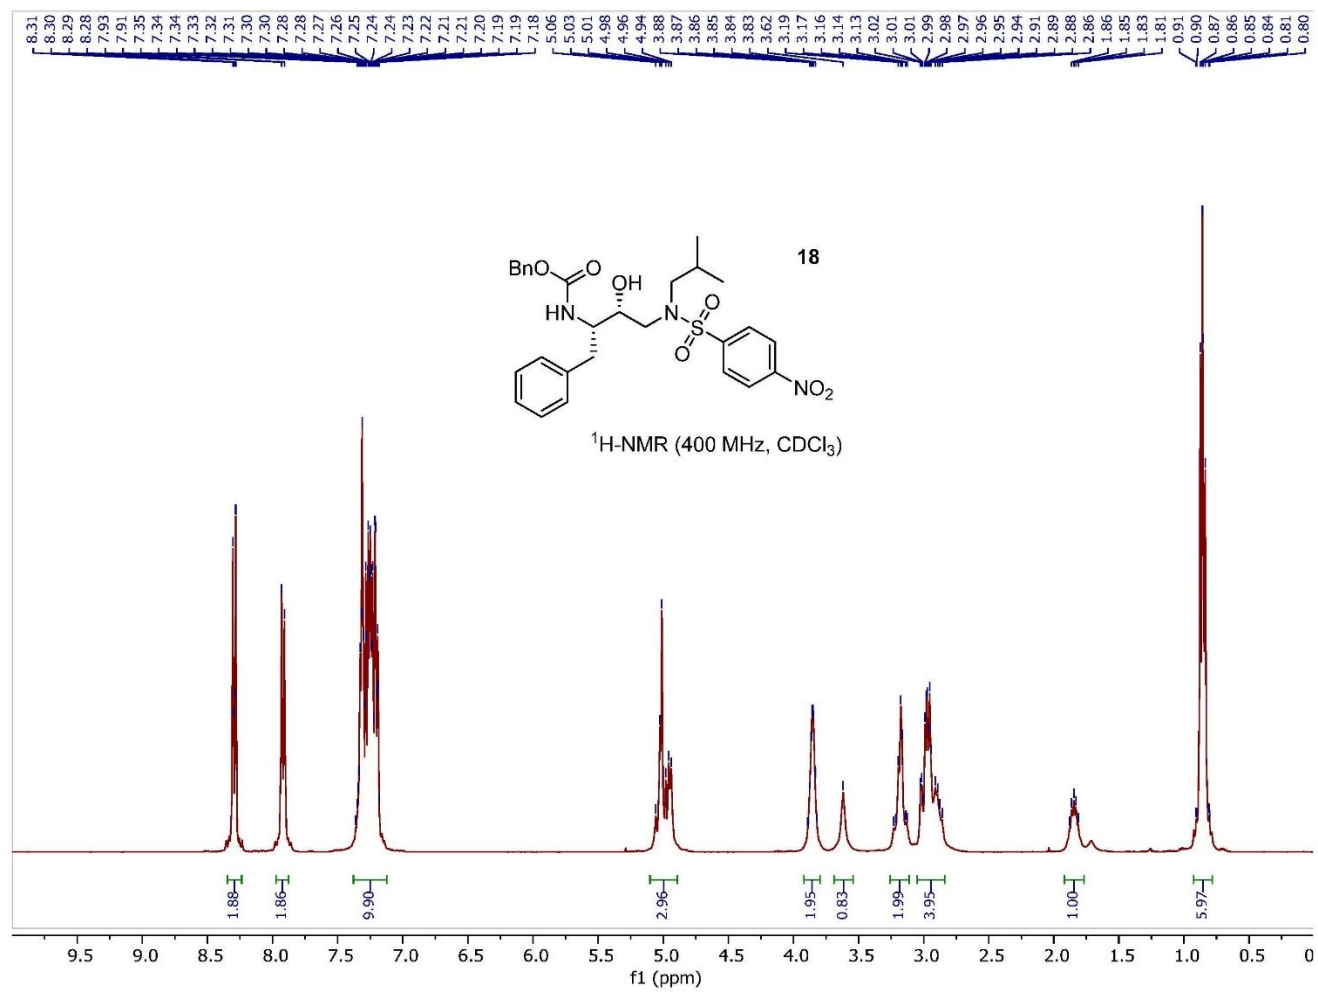

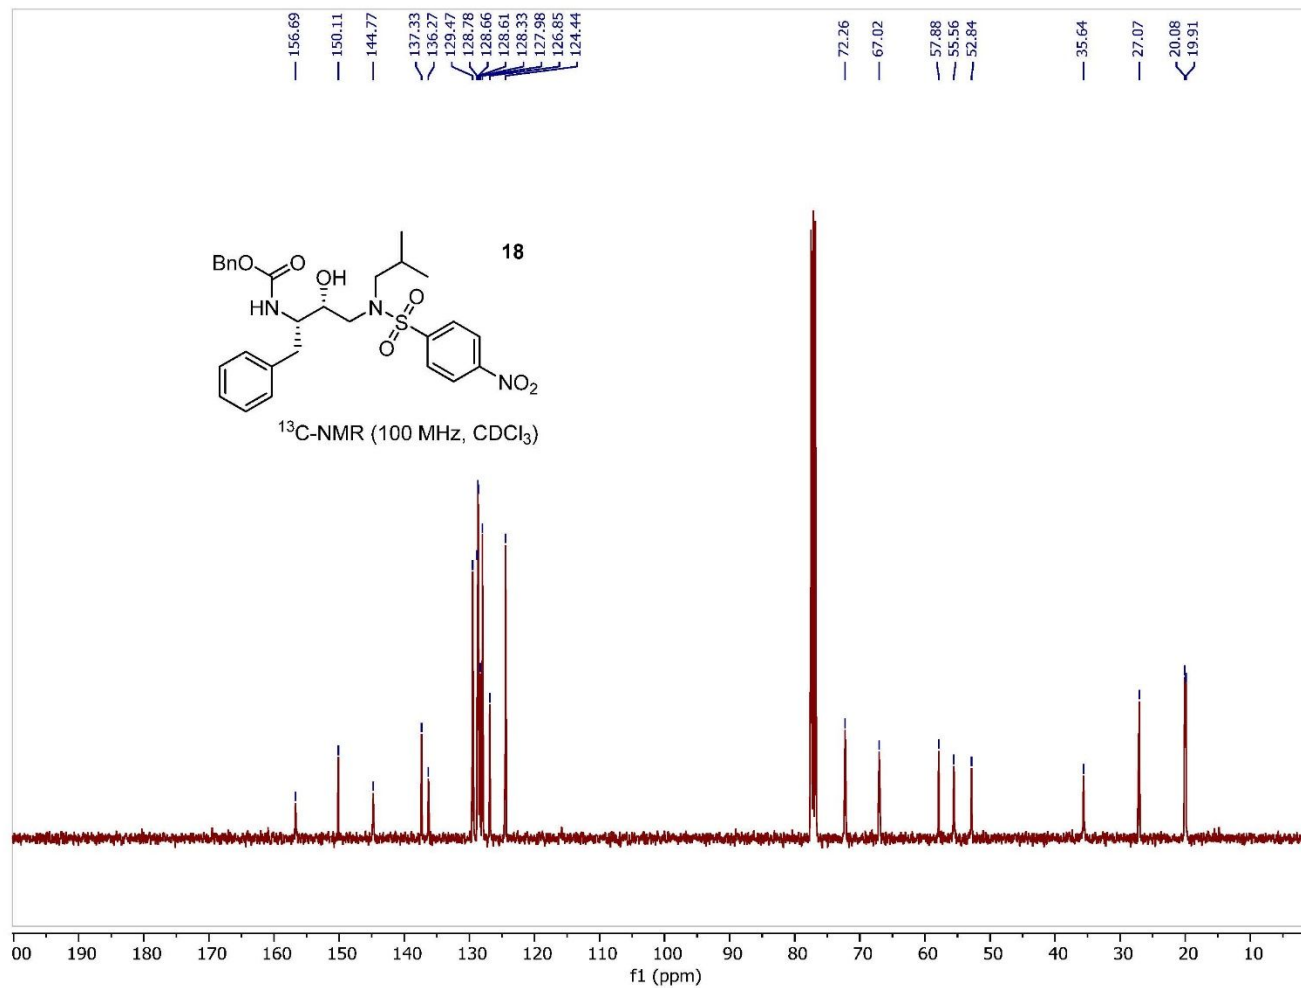

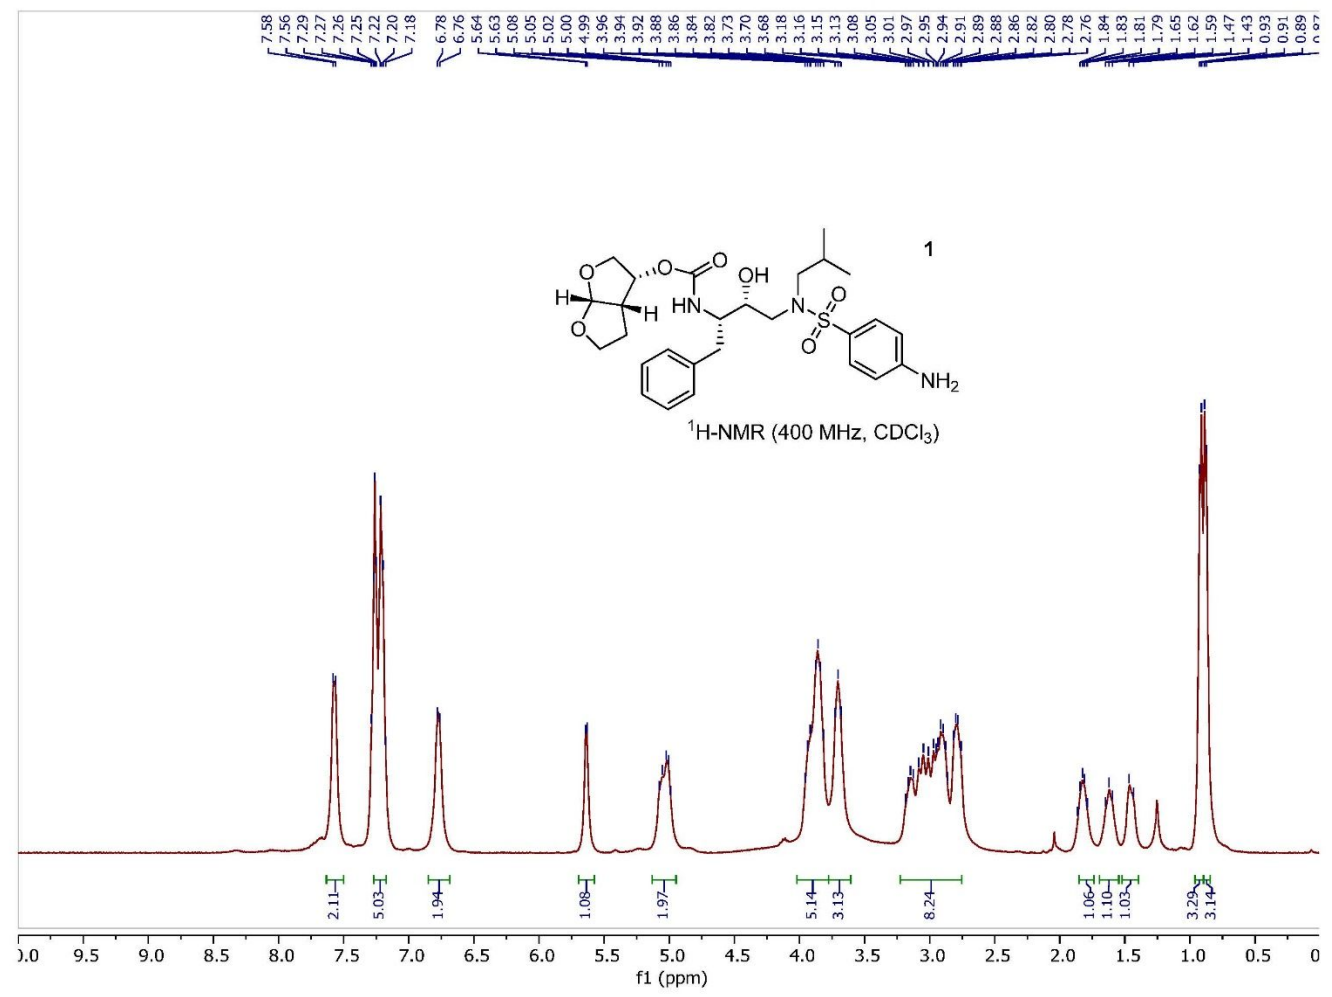

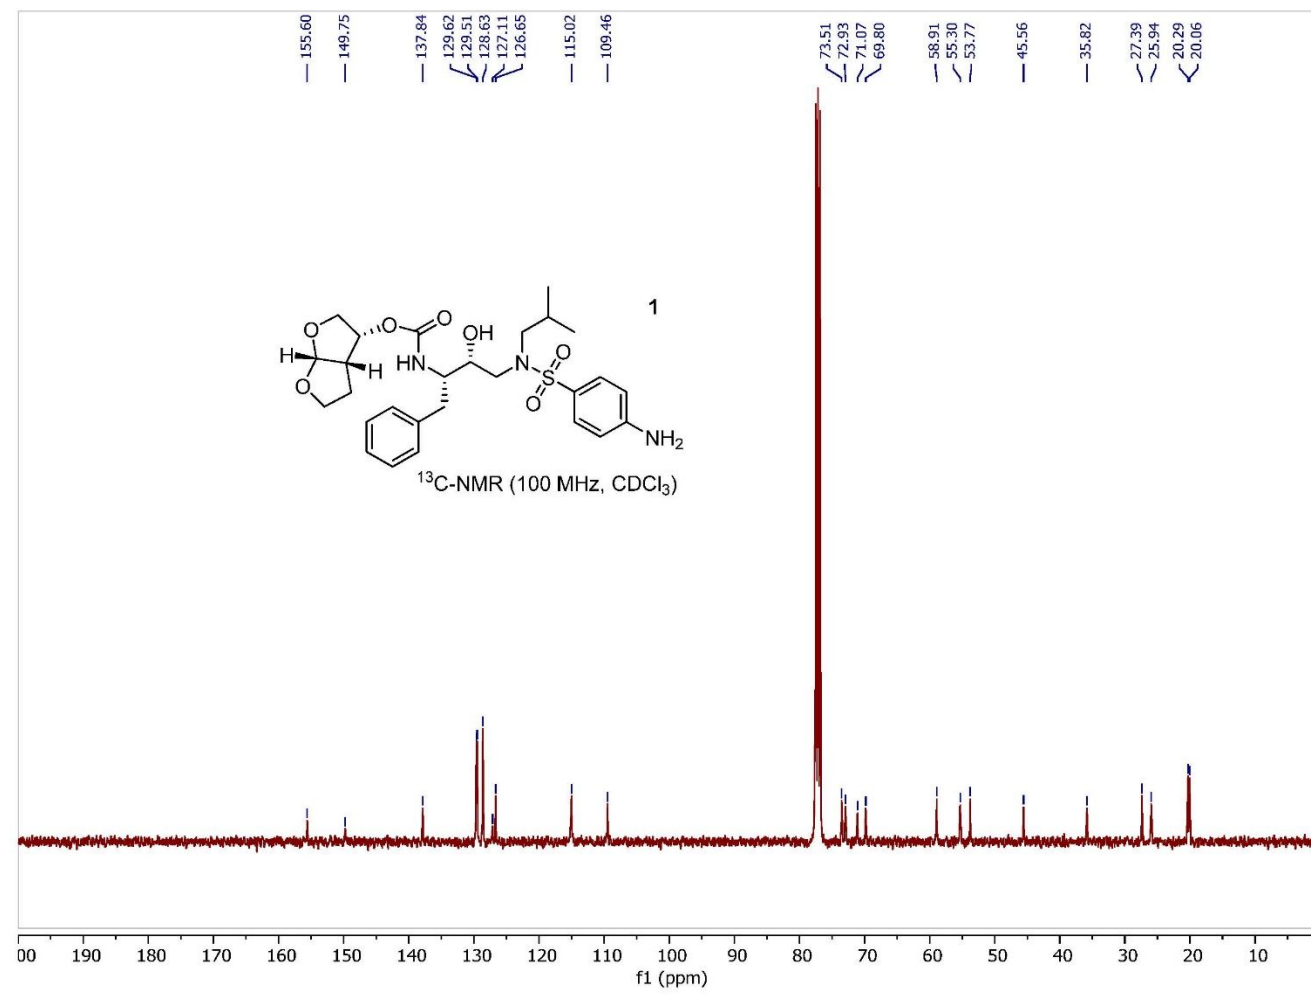

S31

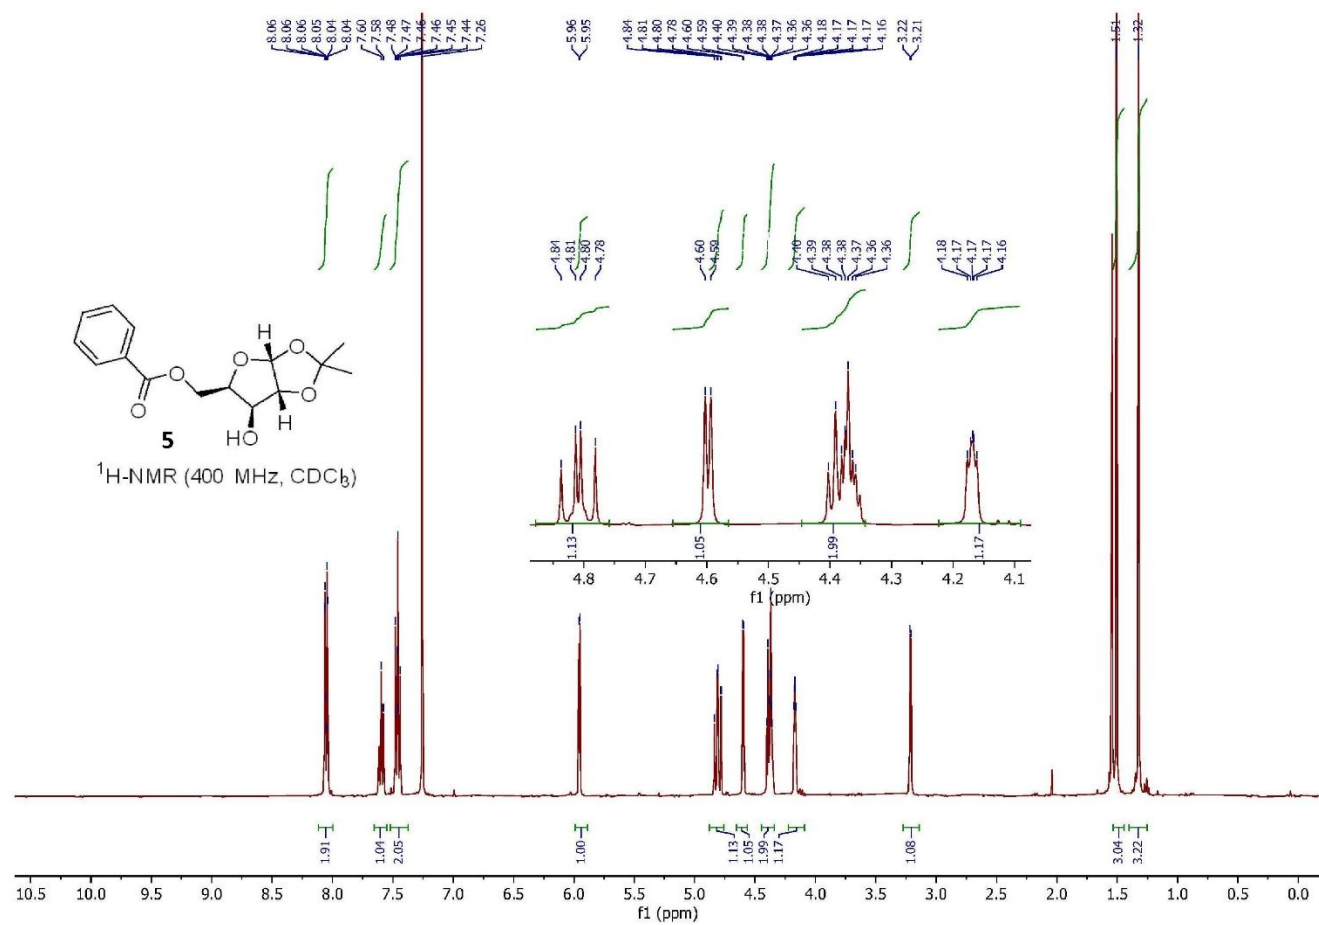



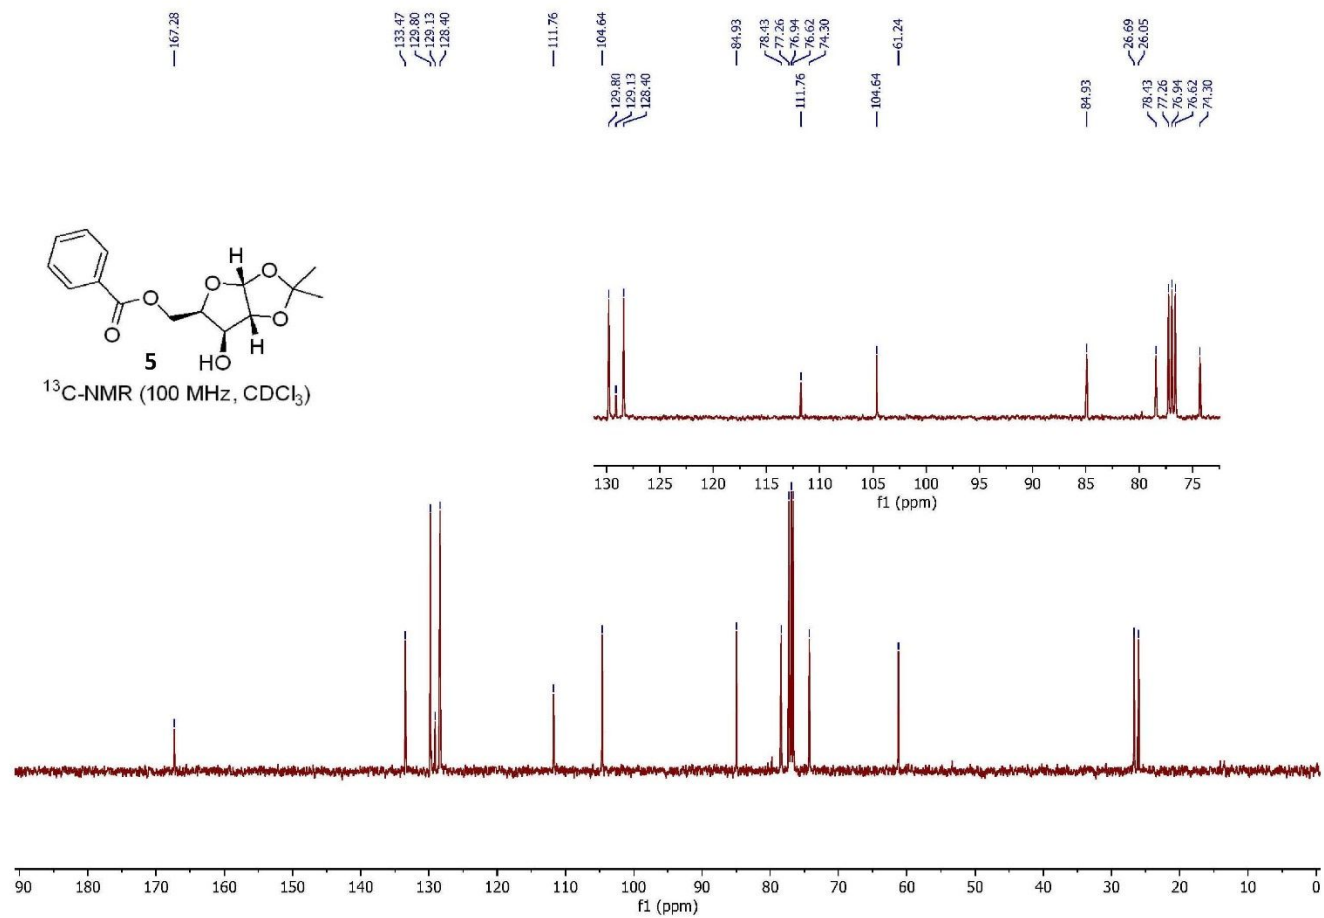

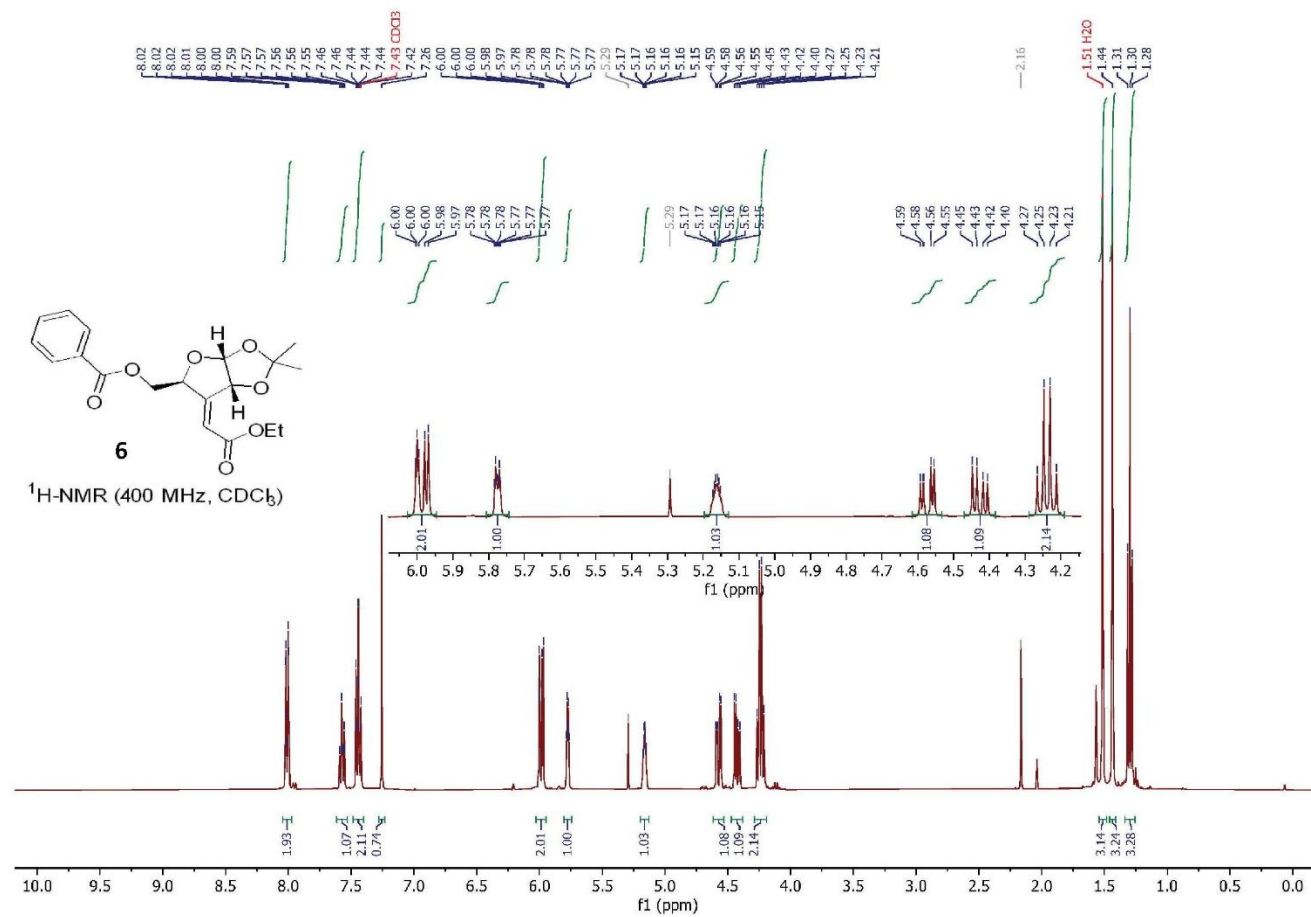

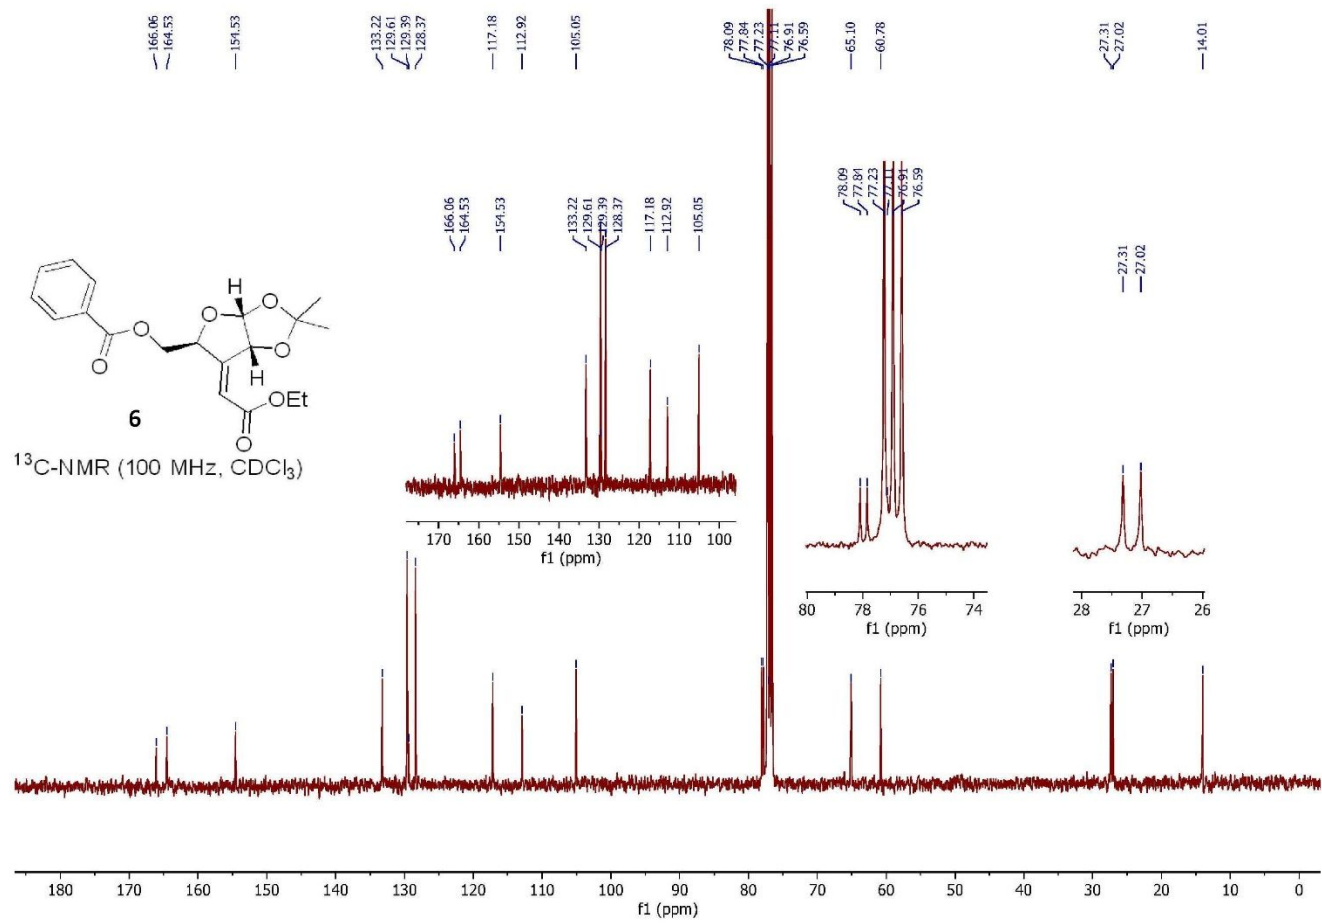

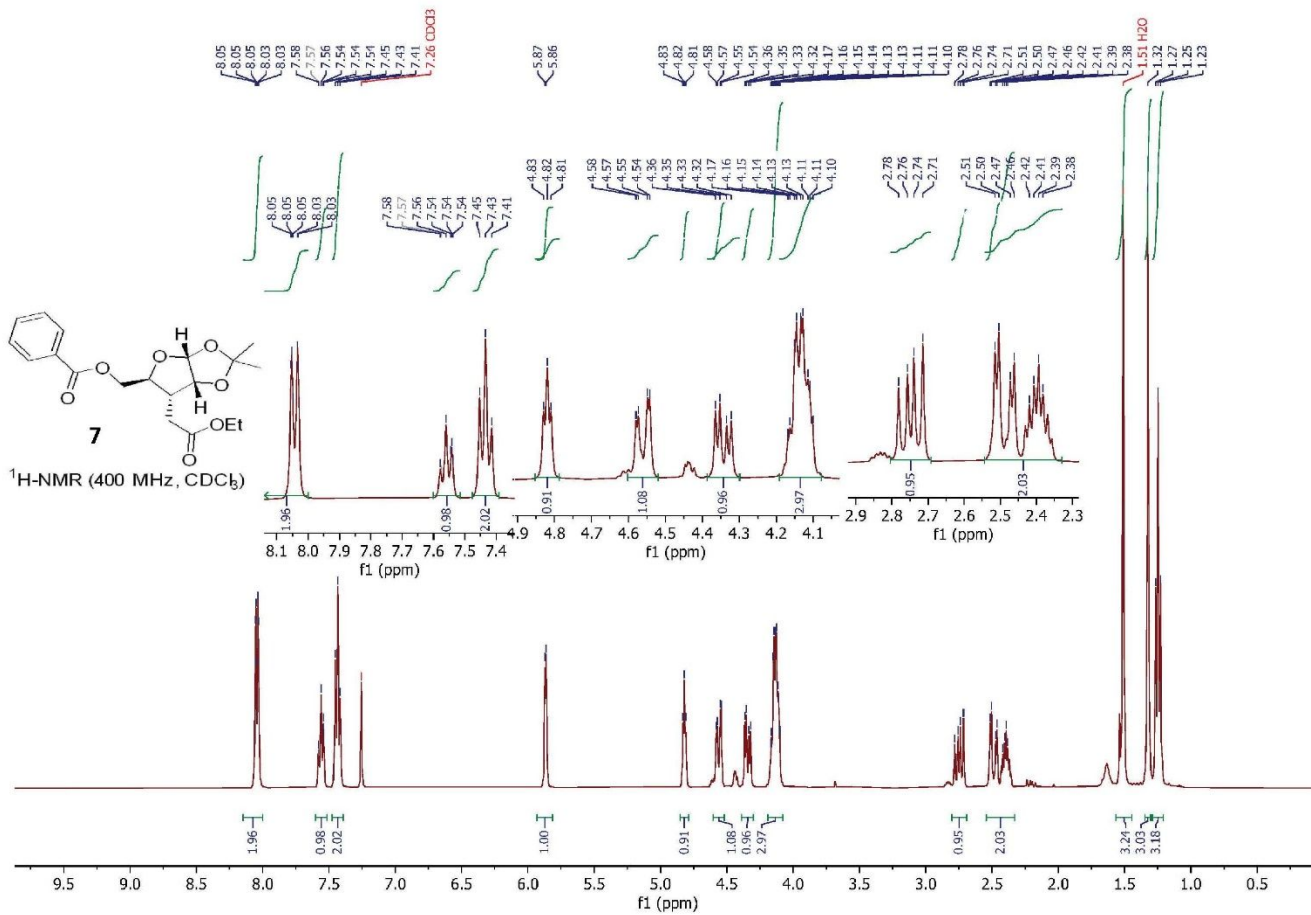

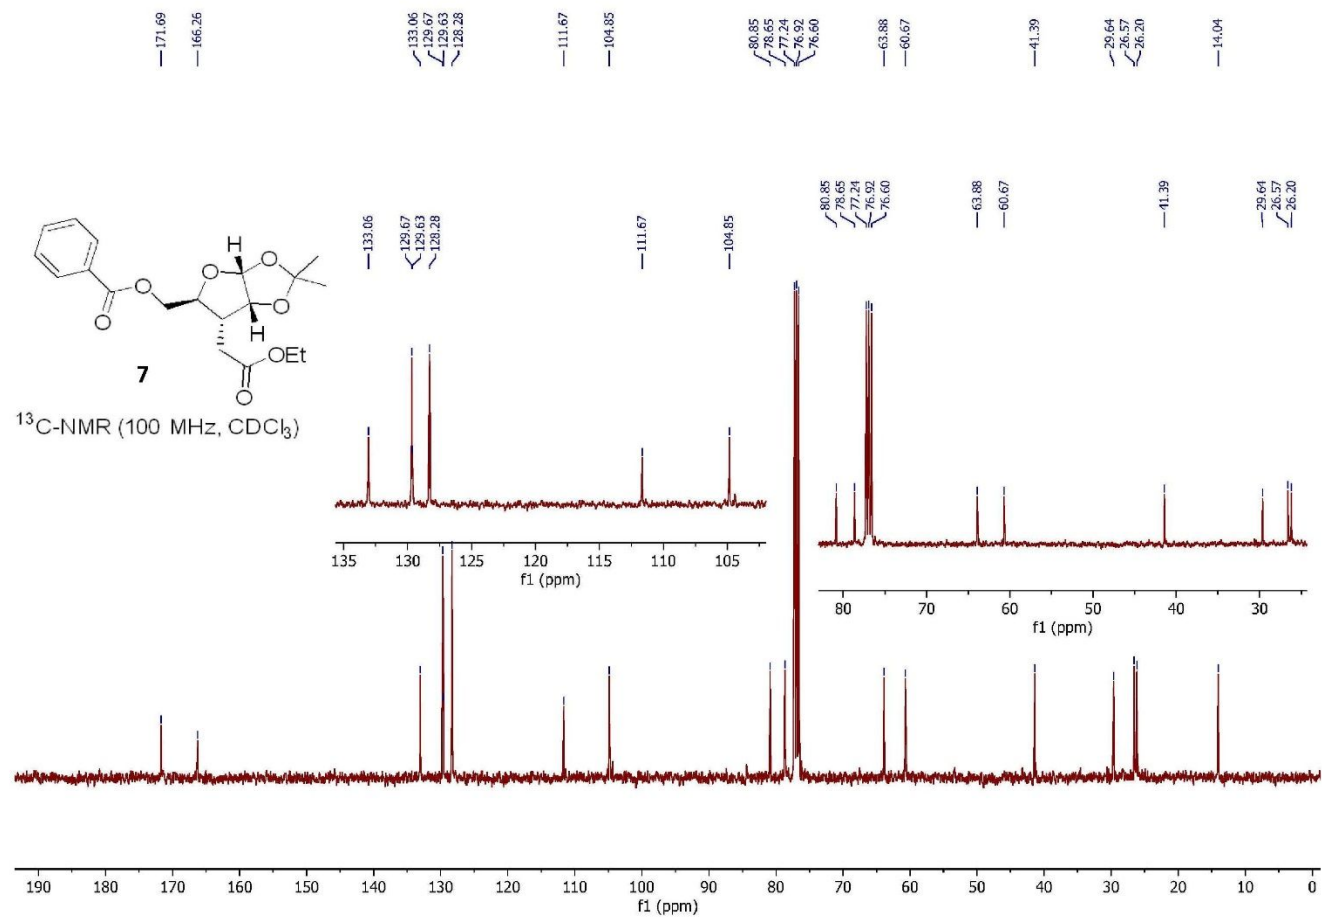

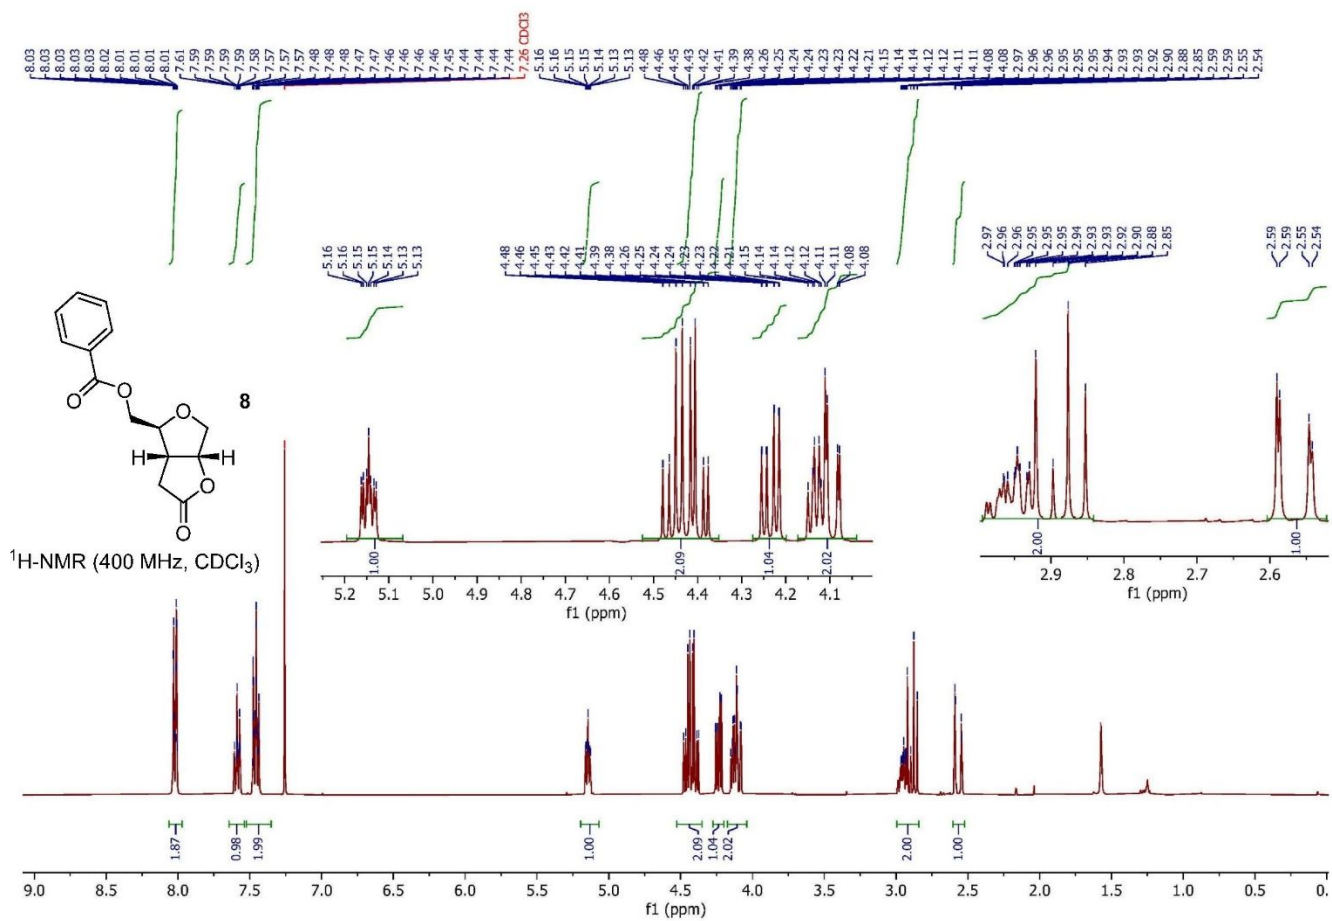

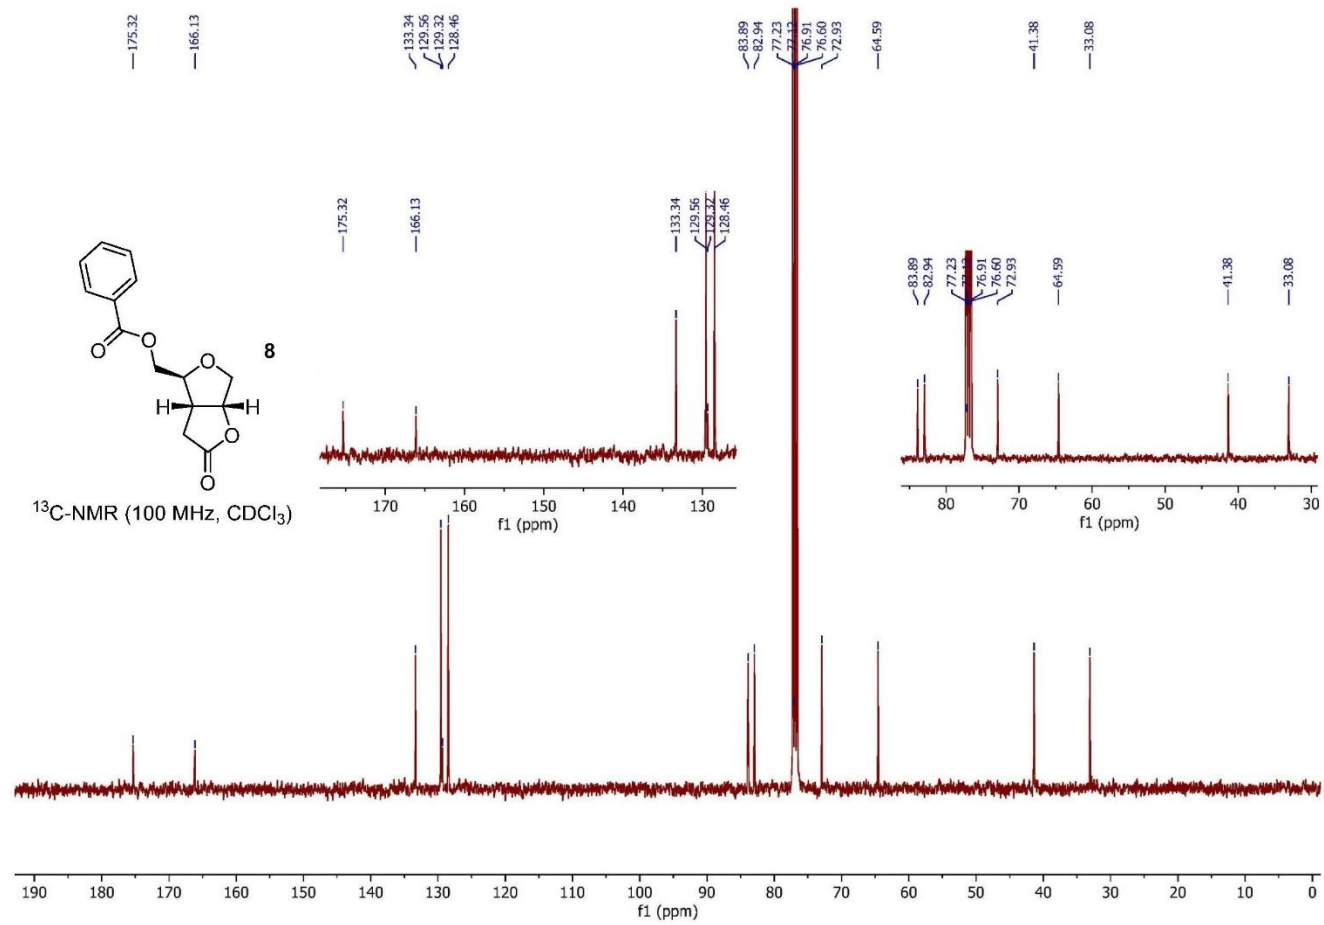

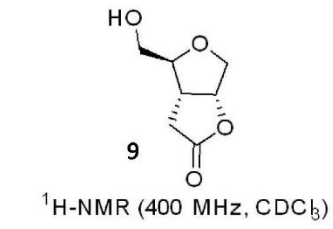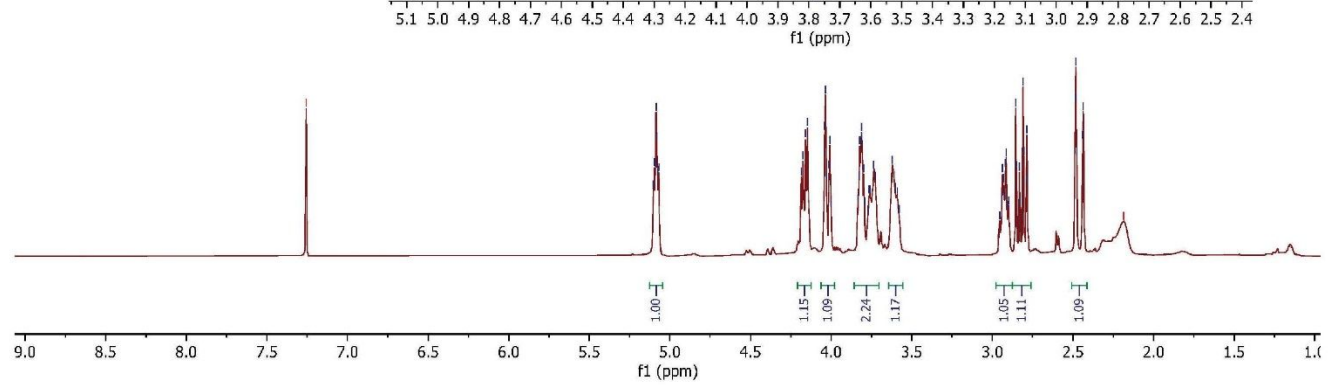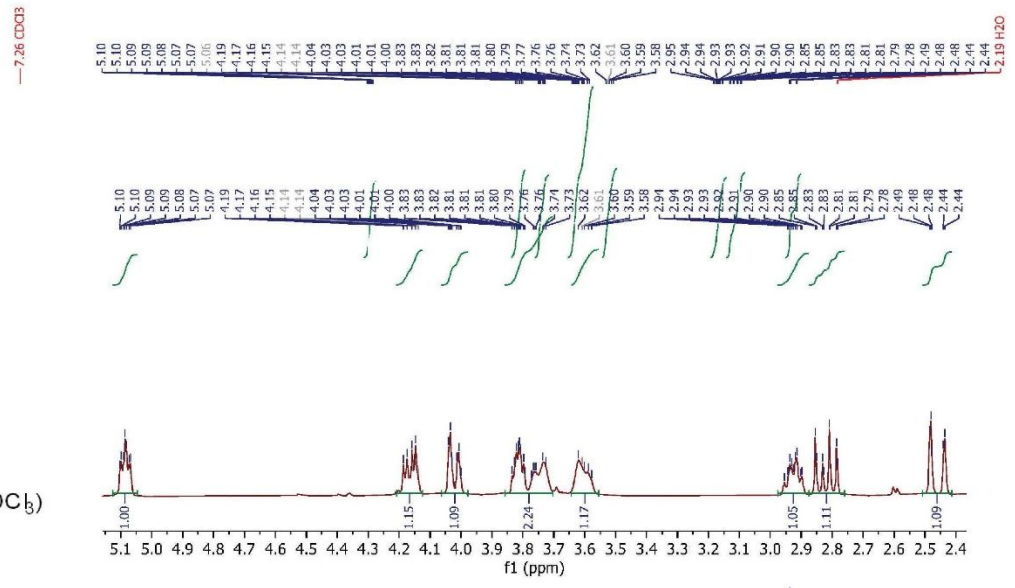



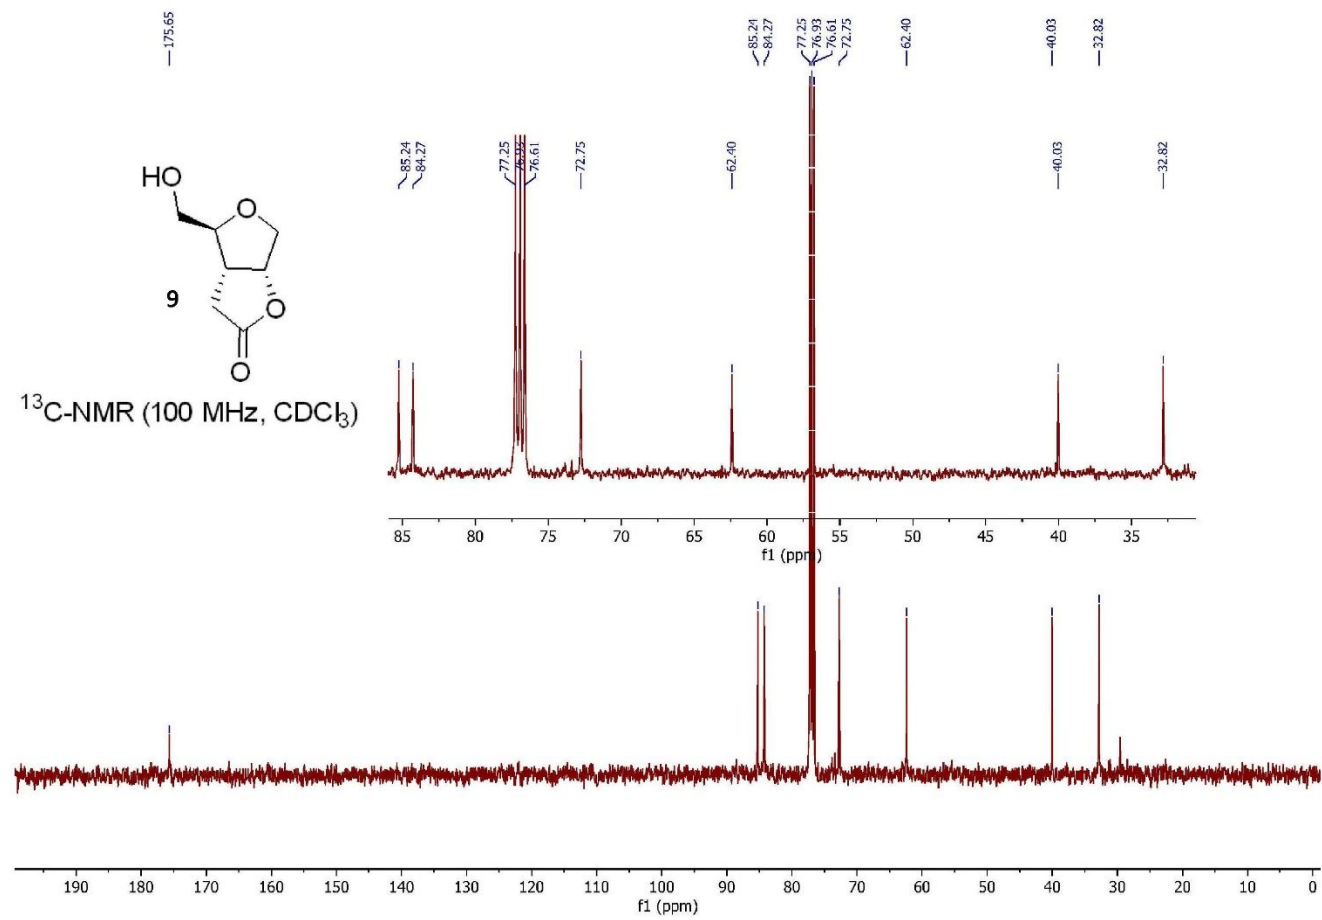

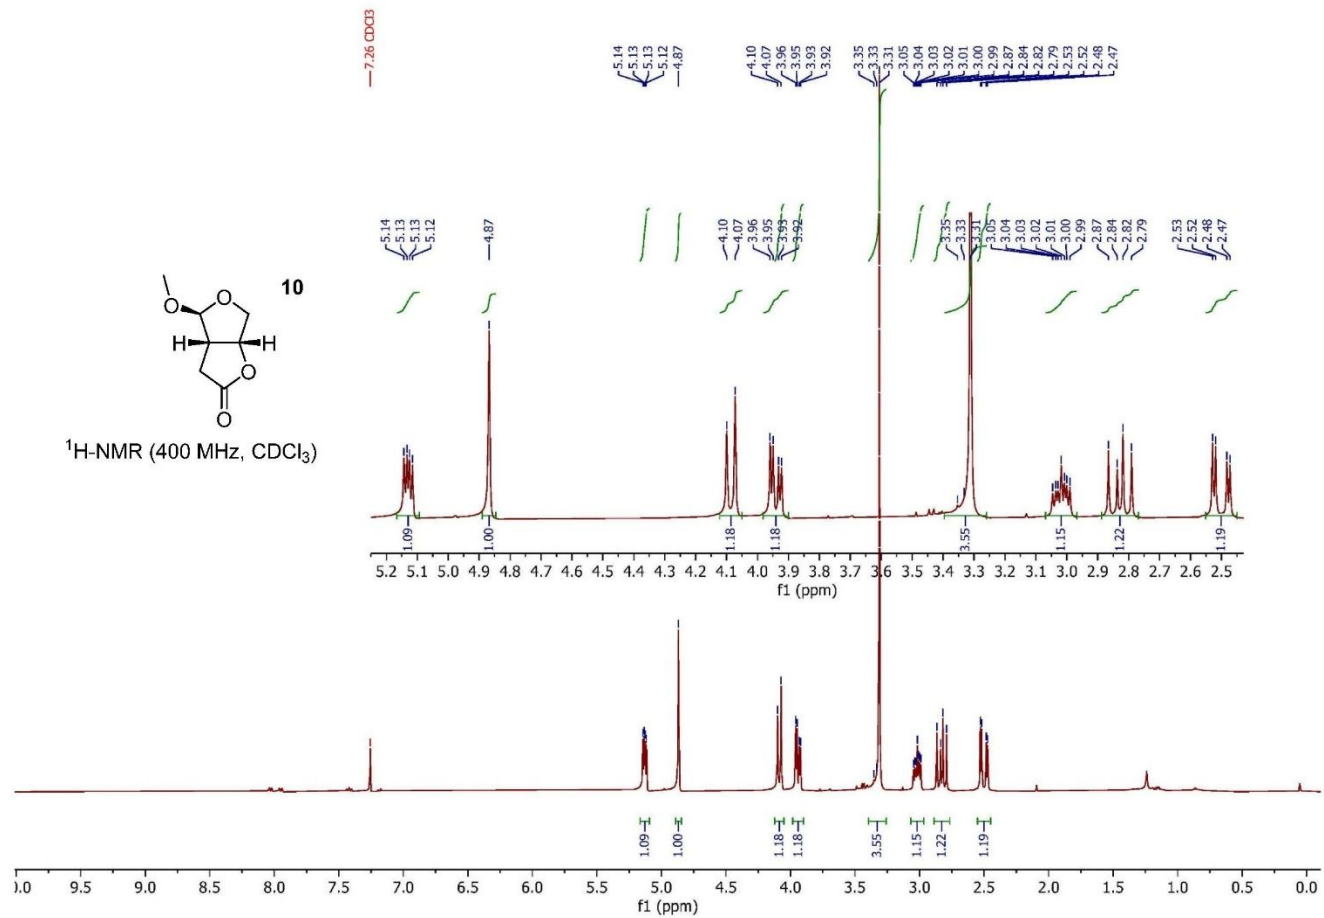

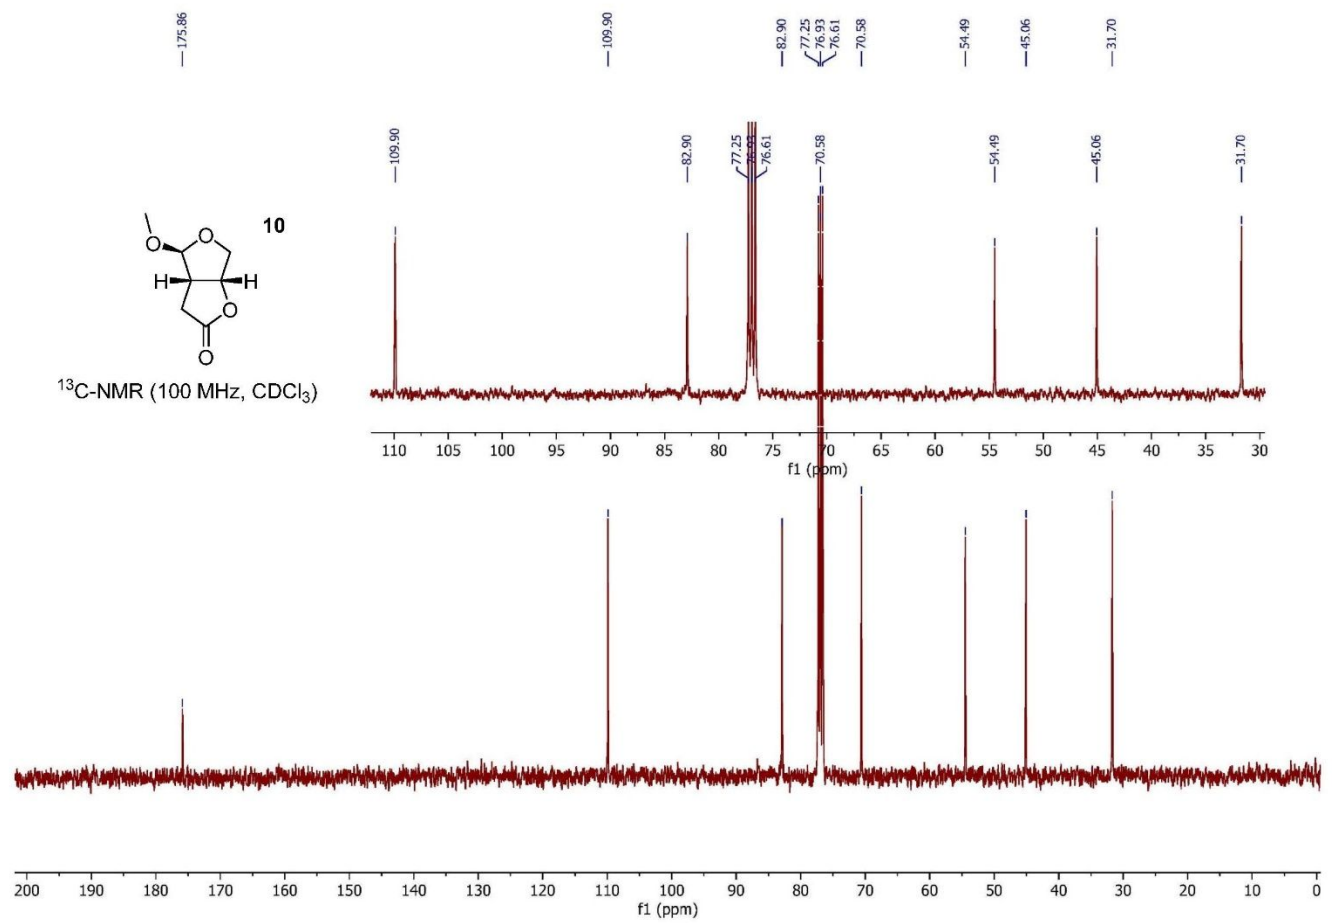

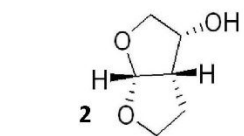

<sup>1</sup>H-NMR (400 MHz, CDCl<sub>3</sub>)

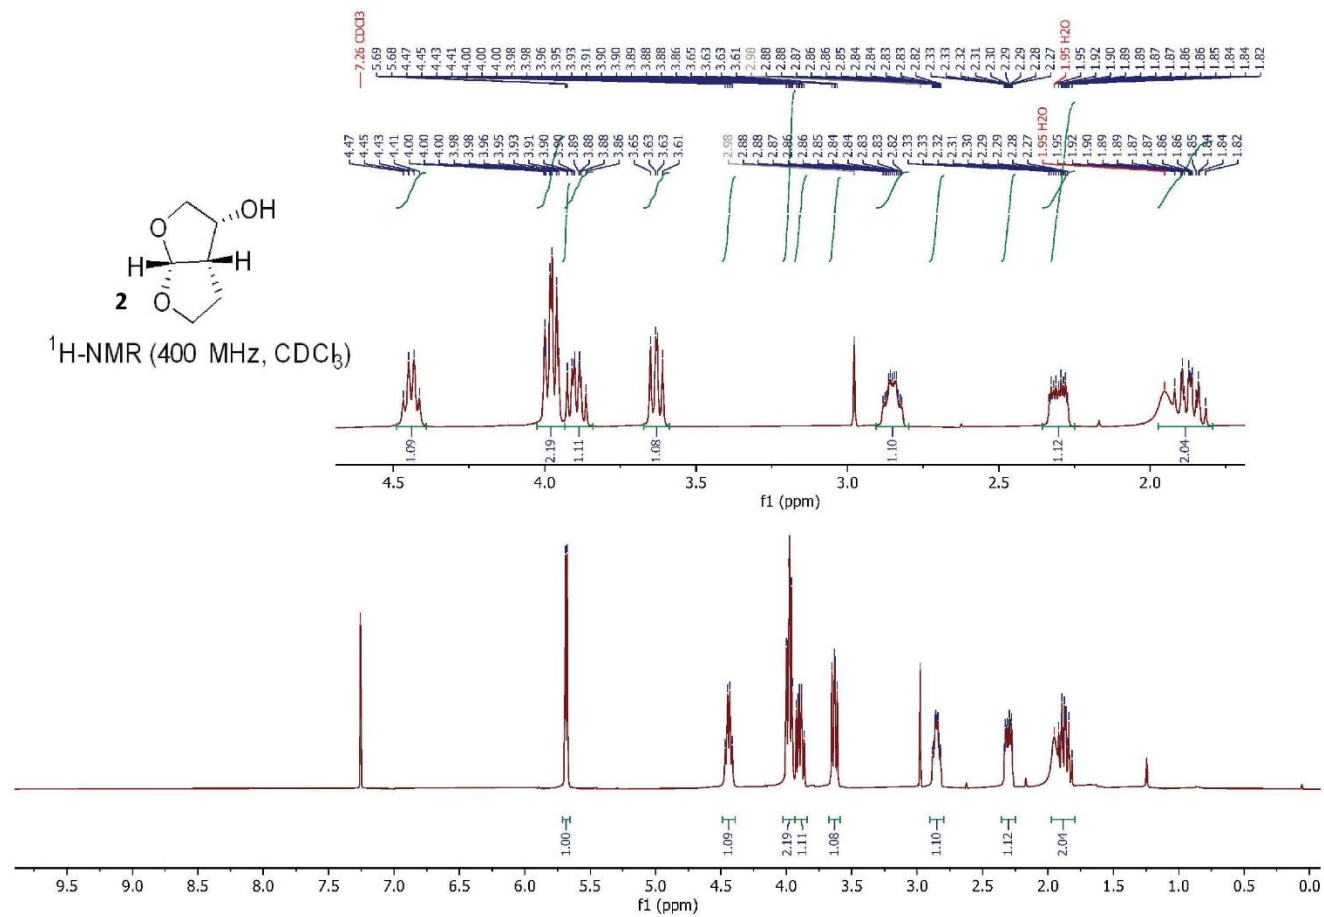

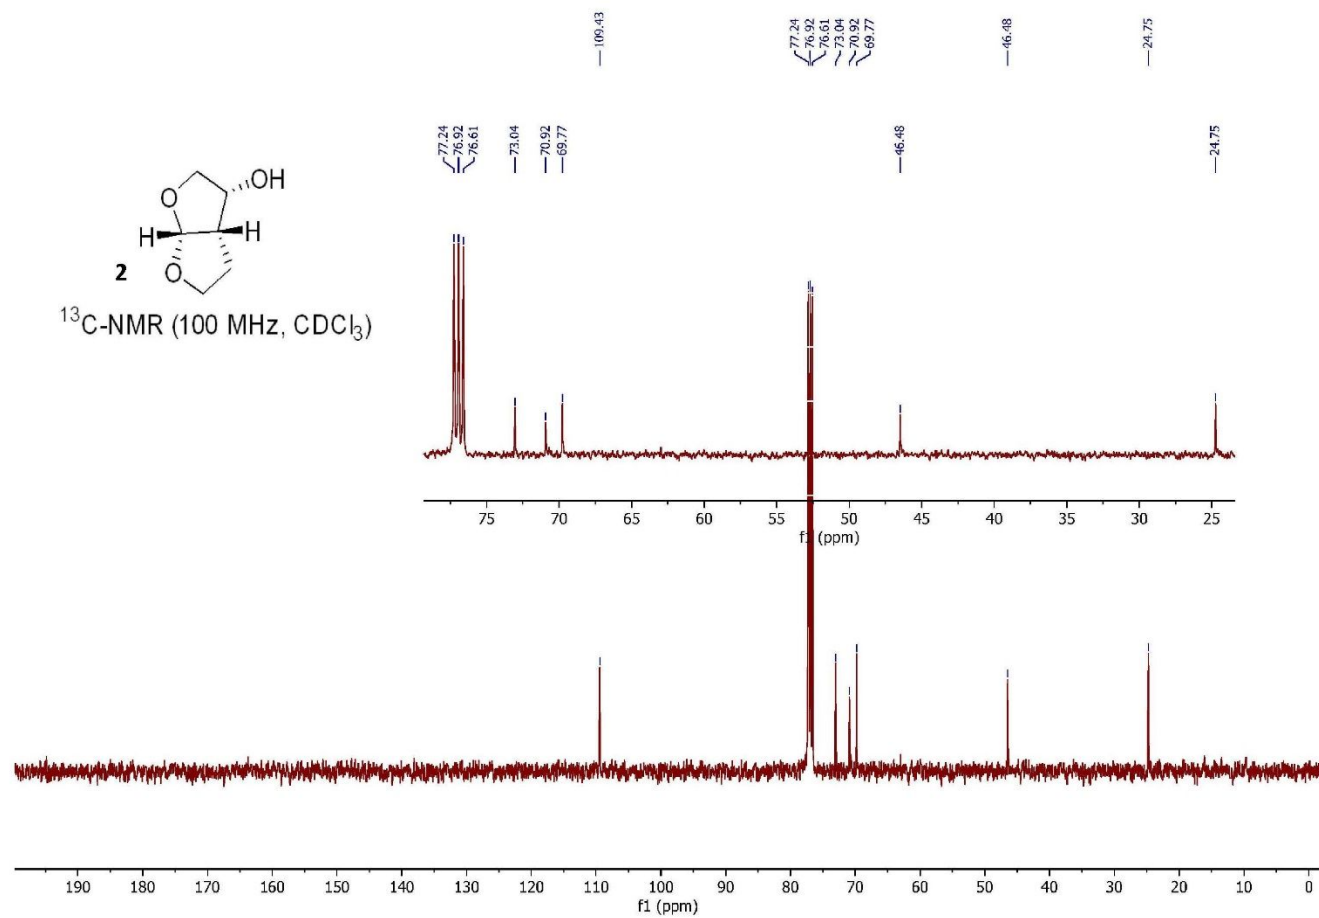

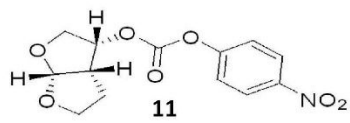

<sup>1</sup>H-NMR (400 MHz, CDCl<sub>3</sub>)

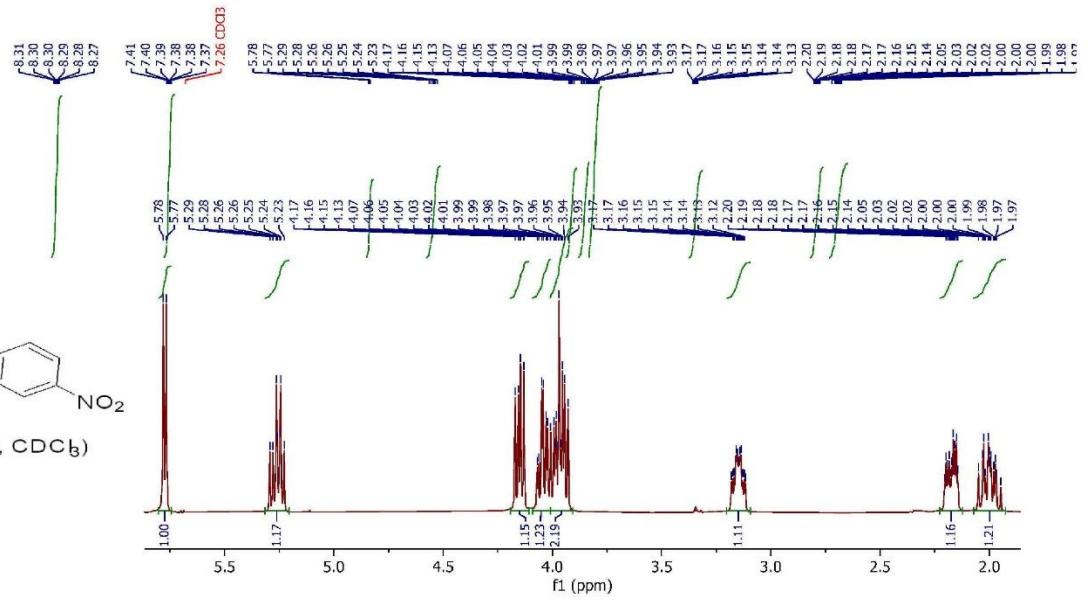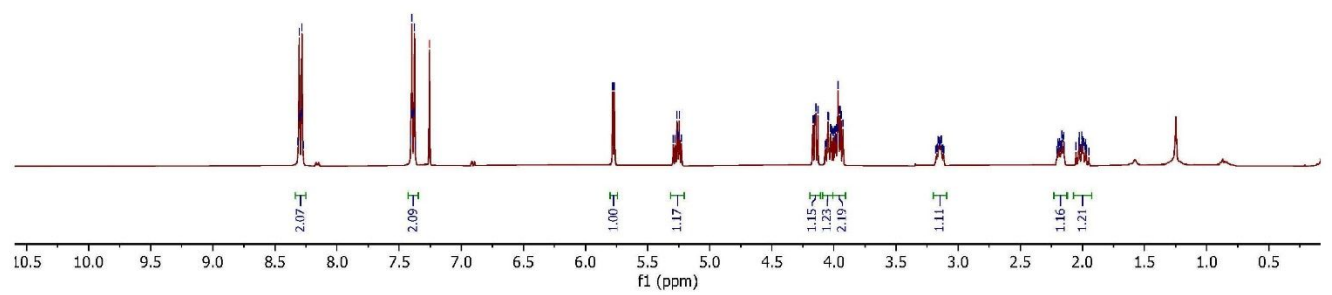

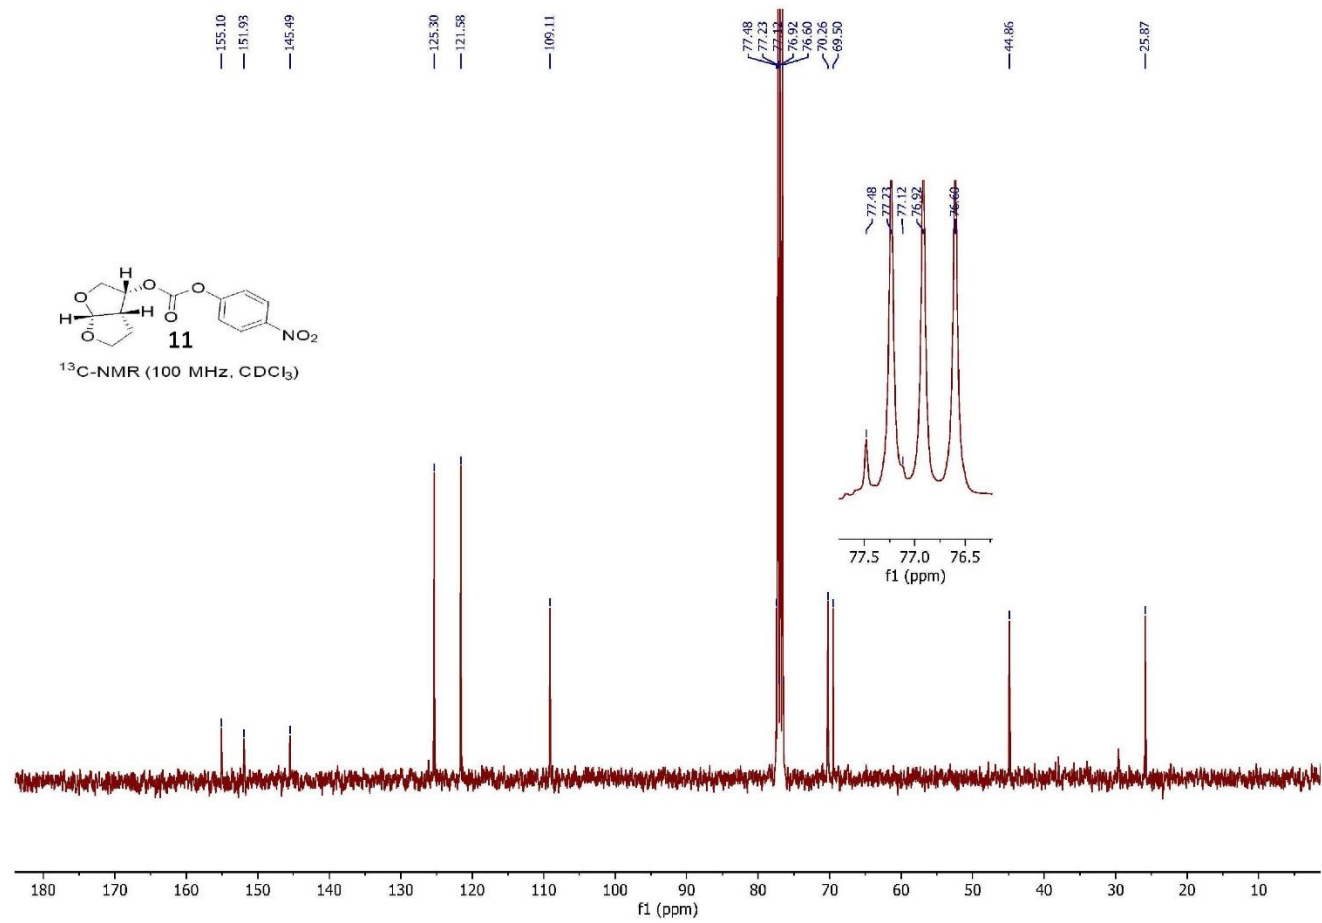

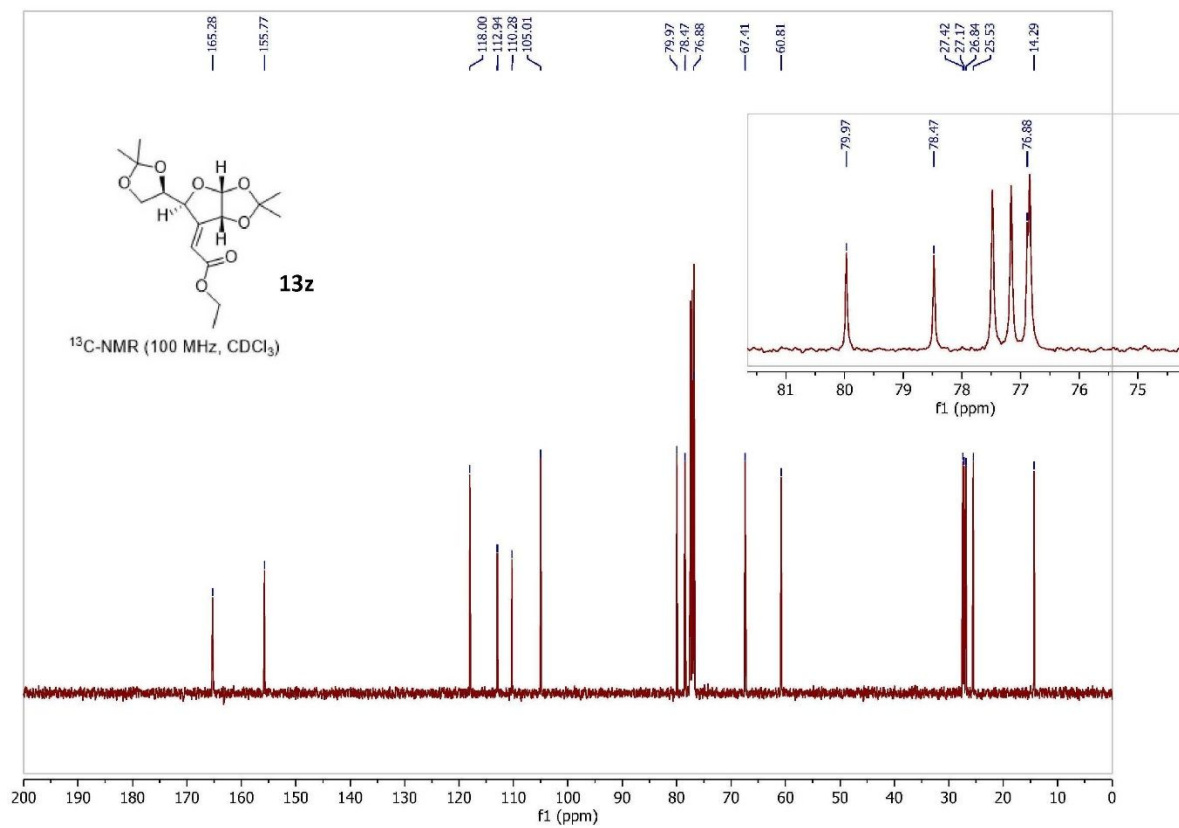



Additional Info : Peak(s) manually integrated

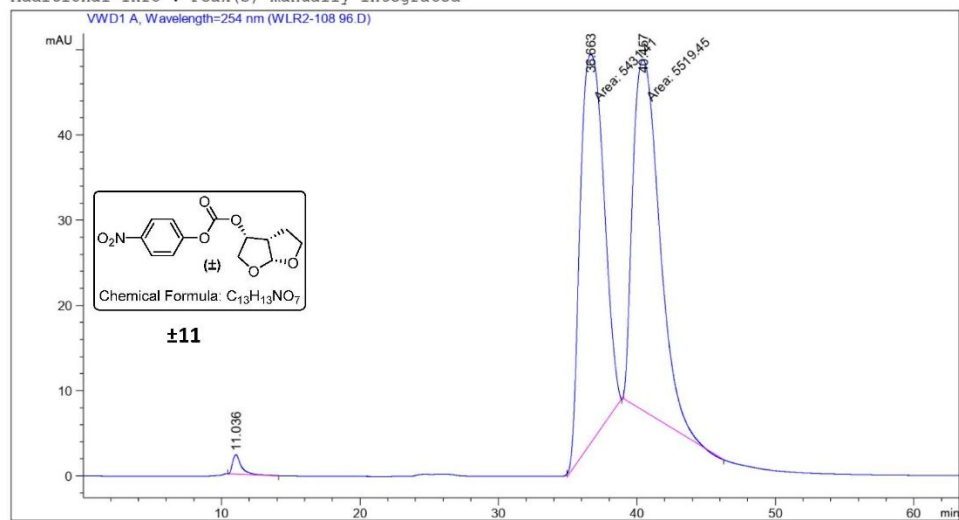

Sample Info : 50% IPA/hexanes  
 CHIRALPAK OD-H  
 0.3 mL/min  
 254 nm  
 5 uL inj.  
 0.633 mg/mL in 50% IPA/Hexanes

| Peak #   | RetTime [min] | Type | Width [min] | Area [mAU*s] | Height [mAU] | Area %  |
|----------|---------------|------|-------------|--------------|--------------|---------|
| 1        | 11.036        | BB   | 0.6337      | 96.94768     | 2.25891      | 0.8775  |
| 2        | 36.663        | MM   | 1.9852      | 5431.40820   | 45.59909     | 49.1628 |
| 3        | 40.457        | MM   | 2.2358      | 5519.45410   | 41.14417     | 49.9597 |
| Totals : |               |      |             | 1.10478e4    | 89.00217     |         |

Additional Info : Peak(s) manually integrated

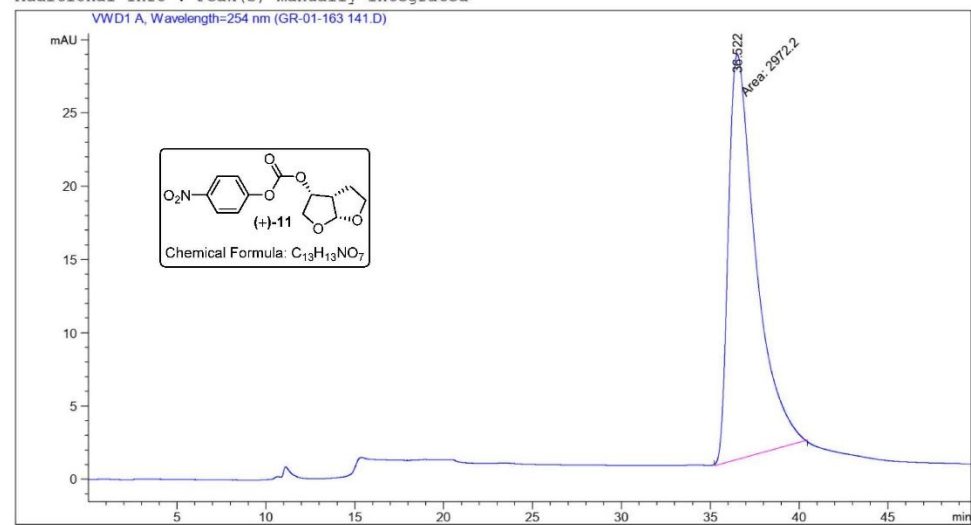

Sample Info : CHIRALPAK OD-H  
50% IPA  
1.3 mg/mL in 50% IPA  
0.110 mL/min  
254 nm  
5 uL inj.

Signal 1: VWD1 A, Wavelength=254 nm

| Peak # | RetTime [min] | Type | Width [min] | Area [mAU*s] | Height [mAU] | Area %   |
|--------|---------------|------|-------------|--------------|--------------|----------|
| 1      | 36.522        | MM   | 1.7919      | 2972.19873   | 27.64478     | 100.0000 |

Totals :                    2972.19873    27.64478
